# Supplementary material for: Genome-level homology and phylogeny of Vibrionaceae (Gammaproteobacteria: Vibrionales) with three new complete genome sequences
Source: PubMed Central journal article supplement (PMC3663674; doi:10.1186/1471-2180-13-80), 2013-04-11
Supplement: 1471-2180-13-80-S1.pdf [file 1471-2180-13-80-S1.pdf]

Table S1: Vibrionaceae 19–taxon large chromosome dataset LCBs and trees.

| LCB | Aligned bp | Algorithm | Tree topologies (Newick)                                                           |
|-----|------------|-----------|------------------------------------------------------------------------------------|
| 1   | 39,097     | MP        | (18,(17,((15,(13,14)),(16,((5,(4,((1,3),(2,0))))),(12,(10,11)),(6,(8,(7,9)))))))); |
|     |            | ML        | (18,(17,((16,(14,15)),(12,((4,(13,(0,(2,(1,3))))),(9,(10,11)),(5,(8,(6,7))))))));  |
| 2   | 11,285     | MP        | (18,(17,((16,(14,15)),((11,(9,10)),(8,((7,(6,(4,5))),(13,(12,((1,3),(2,0))))))));  |
|     |            | ML        | (18,((17,(16,(14,15))),(12,(4,((13,(0,(2,(1,3))))),(10,(9,11)),(5,(6,(7,8))))));   |
| 3   | 13,886     | MP        | (18,(17,((16,(14,15)),((11,(9,10)),(8,((7,(4,(5,6))),(13,(12,((1,3),(2,0))))))));  |
|     |            | ML        | (18,(17,((12,(16,(14,15))),((11,(9,10)),(5,((7,(6,8))),(4,(13,(0,(2,(1,3))))))));  |
| 4   | 1,030      | MP        | (18,(17,((16,(14,15)),((11,(9,10)),(8,((7,(4,(5,6))),(13,(12,((1,3),(2,0))))))));  |
|     |            | ML        | (18,(3,2,1,(0,(13,(4,((11,10,9)),(5,(6,(7,8))),(12,(17,(16,(14,15))))))));         |
| 5   | 4,129      | MP        | (18,((17,(16,(14,15))),(13,(12,((2,3),(1,0)),(4,((11,(9,10)),(8,(6,(5,7))))))));   |
|     |            | ML        | (18,(12,((9,(10,11)),(5,(6,(7,8))),((4,(17,(16,(14,15))),(13,(0,(3,2,1))))));      |
| 6   | 3,801      | MP        | (18,((14,(12,13)),(16,((15,(4,(0,(3,(1,2))))),(17,((11,(9,10)),(5,(8,(6,7)))))))); |
|     |            | MP        | (18,((14,(12,13)),(16,((15,(4,(0,(3,(1,2))))),(17,((9,(10,11)),(5,(8,(6,7)))))))); |
|     |            | ML        | (18,((16,(14,15)),(17,(12,((8,(5,(6,7))),((9,(10,11)),(4,(13,(1,0,3,2))))))));     |
| 7   | 7,936      | MP        | (18,((0,(1,(2,3))),(4,(13,((12,(17,(16,(14,15))),((10,(9,11)),(8,(6,(5,7))))))));  |
|     |            | MP        | (18,((17,(16,(14,15))),(13,((0,1,2,3),(4,(12,((11,(9,10)),(8,(5,(6,7))))))));      |
|     |            | ML        | (18,((0,(2,(1,3))),(4,(13,((10,(9,11)),(8,(5,(6,7))),(12,(17,(16,(14,15))))))));   |
| 8   | 12,328     | MP        | (18,((16,(14,15)),(17,(13,((5,(4,(2,(1,(3,0))))),(10,(11,12)),(9,(8,(6,7))))))));  |
|     |            | ML        | (18,((9,(10,11)),((6,(5,(7,8))),(12,((17,(16,(14,15))),(4,(13,(0,3,1,2))))))));    |
| 9   | 7,326      | MP        | (18,((16,(14,15)),(17,(13,((5,(4,(2,(1,(3,0))))),(10,(11,12)),(9,(6,(7,8))))))));  |
|     |            | ML        | (18,((17,(16,(14,15))),((4,(13,(0,2,3,1))),(12,((10,(9,11)),(5,(6,(7,8))))))));    |
| 10  | 40,528     | MP        | (18,(17,((16,(14,15)),((12,13),(2,3),(1,0)),(11,(7,((4,(5,6)),(9,(8,10))))))));    |
|     |            | ML        | (18,((17,(16,(14,15))),((4,(13,(0,(2,(1,3))))),(9,(10,11)),(12,(8,(6,(5,7)))))))); |
| 11  | 7,444      | MP        | (18,((17,(16,(14,15))),((2,(3,(1,0))),(12,(13,(11,(7,((4,(5,6)),(9,(8,10))))))));  |
|     |            | MP        | (18,(17,((16,(14,15)),(11,(13,(6,(5,7))))),(4,(10,(8,9))),(12,(2,(1,(3,0))))));    |
|     |            | ML        | (18,(17,((16,(14,15)),(12,((4,(13,(0,(3,1,2))))),(11,(9,10)),(7,8),(5,6))))));     |
| 12  | 1,325      | MP        | (18,(17,((16,(14,15)),(11,(13,(7,(5,6))))),(4,(10,(8,9))),(12,(2,(1,(3,0))))));    |
|     |            | ML        | (18,(17,((16,(14,15)),(12,((5,(7,(6,8))),((10,(9,11)),(4,(13,(2,3,0,1))))))));     |
| 13  | 6,619      | MP        | (18,(17,((16,(14,15)),(11,(13,((12,(3,(2,(1,0))))),(10,(8,9)),(7,(4,(5,6))))))));  |
|     |            | ML        | (18,(17,((16,(14,15)),(12,((4,(13,(0,2,(1,3))))),(10,(9,11)),(5,(7,(6,8))))))));   |
| 14  | 6,341      | MP        | (18,(17,((16,(14,15)),(11,(13,((12,(3,(2,(1,0))))),(10,(8,9)),(4,(6,(5,7))))))));  |
|     |            | ML        | (18,((17,(16,(14,15))),(12,((4,(13,(3,1,(0,2))))),(11,(9,10)),(5,(7,(6,8))))));    |
| 15  | 4,806      | MP        | (18,((16,(14,15)),(17,((8,(9,10)),(7,(4,(5,6))),(11,(12,(13,(0,(3,(1,2))))))));    |
|     |            | ML        | (18,((17,(16,(14,15))),((4,(13,(2,3,0,1))),(12,((10,(9,11)),(5,(8,(6,7))))))));    |
| 16  | 4,942      | MP        | (18,((16,(14,15)),(17,((8,(9,10)),(4,(7,(5,6))),(11,(12,(13,(0,(3,(1,2))))))));    |
|     |            | ML        | (18,((17,(16,(14,15))),(12,((4,(13,(1,3,(0,2))))),(9,(10,11)),(5,(8,(6,7))))));    |
| 17  | 7,302      | MP        | (18,(6,((1,(3,(2,0))),(12,(17,((4,16)),(5,(7,8)),(10,(9,11)),(15,(13,14))))));     |
|     |            | ML        | (18,(17,((16,(14,15)),(12,((4,(13,(1,0,2,3))),((11,(9,10)),(5,(8,(6,7))))))));     |
| 18  | 4,390      | MP        | (18,(6,((1,(3,(2,0))),(12,(17,((4,16)),(5,(7,8)),(11,(9,10)),(15,(13,14))))));     |

Table S1: Vibrionaceae 19–taxon large chromosome dataset LCBs and trees (continued).

| LCB | Aligned bp | Algorithm | Tree topologies (Newick)                                                            |
|-----|------------|-----------|-------------------------------------------------------------------------------------|
| 19  | 15,459     | ML        | (18,(13,((4,(0,2,1,3)),(12,((17,(16,(14,15))),((10,(9,11)),(5,(8,(6,7)))))))));     |
|     |            | MP        | (18,((14,(17,(15,16))),(13,((12,(4,((2,3),(1,0))),((11,(9,10)),(5,(7,(6,8))))))))); |
| 20  | 12,293     | ML        | (18,((17,(16,(14,15))),(12,((4,(13,(0,(2,1,3))),((11,(9,10)),(5,(8,(6,7)))))))));   |
|     |            | MP        | (18,(5,(10,((17,(16,(14,15))),((4,(0,(1,(2,3))),((12,(11,13)),(6,(7,(8,9)))))))));  |
| 21  | 19,929     | ML        | (18,(17,((13,(4,(0,2,3,1))),((11,(9,10)),(8,(6,7)),(5,(12,(16,(14,15)))))))));      |
|     |            | MP        | (18,(5,(10,((17,(16,(14,15))),((4,(0,(1,(2,3))),((11,(12,13)),(6,(7,(8,9)))))))));  |
| 22  | 33,541     | ML        | (18,((13,(0,(3,2,1))),(4,((17,(16,(14,15))),((11,(9,10)),(12,(8,(5,(6,7)))))))));   |
|     |            | MP        | (18,(13,((17,(16,(14,15))),(4,(9,((3,(0,(1,2))),((12,(10,11)),(8,(7,(5,6)))))))));  |
| 23  | 151,773    | ML        | (18,(4,(13,(0,(2,3,1))),((12,(17,(16,(14,15))),((9,(10,11)),(8,(5,(6,7)))))))));    |
|     |            | MP        | (18,(13,((17,(16,(14,15))),(4,((3,(0,(1,2))),(9,((12,(10,11)),(8,(7,(5,6)))))))));  |
| 24  | 5,189      | ML        | (18,((17,(16,(14,15))),(12,((5,(6,(7,8))),((10,(9,11)),(4,(13,(0,(2,3,1)))))))));   |
|     |            | MP        | (18,(17,((16,(14,15))),(13,((5,(4,((2,3),(1,0))),((10,(11,12)),(9,(6,(7,8))))))))); |
| 25  | 6,526      | ML        | (18,(17,((16,(14,15))),((9,(10,11)),((12,(5,(8,(6,7))),(4,(13,(0,(1,2,3)))))))));   |
|     |            | MP        | (18,(15,(14,(16,(17,((13,(12,(0,(2,(1,3))))),((7,(4,(5,6))),(11,(8,(9,10)))))))));  |
| 26  | 42,063     | ML        | (18,(17,((16,(14,15)),(12,((4,(13,(0,(3,1,2))),((10,(9,11)),(5,(8,(6,7)))))))));    |
|     |            | MP        | (18,(15,(14,(16,(17,((13,(12,(0,(2,(1,3))))),((7,(4,(5,6))),(11,(10,(8,9)))))))));  |
| 27  | 11,968     | ML        | (18,(17,((16,(14,15))),((4,(0,(1,(2,3))),(13,((11,(9,10)),(12,(8,(5,(6,7)))))))));  |
|     |            | MP        | (18,((17,(16,(14,15))),((4,(0,(1,(2,3))),(13,((11,(9,10)),(12,(8,(5,(6,7)))))))));  |
| 28  | 15,438     | ML        | (18,(17,((16,(14,15)),(12,((4,(13,(0,(1,2,3))),((9,(10,11)),(8,(7,(5,6)))))))));    |
|     |            | MP        | (18,(5,((17,(16,(14,15))),((4,(1,(0,(2,3))),(13,((12,(10,11)),(9,(6,(7,8)))))))));  |
| 29  | 6,474      | ML        | (18,((16,(14,15)),(17,(12,((5,(8,(6,7))),((9,(10,11)),(4,(13,(0,(2,3,1)))))))));    |
|     |            | MP        | (18,(5,((17,(16,(14,15))),((4,(2,(3,(1,0))),(13,((12,(10,11)),(9,(6,(7,8)))))))));  |
| 30  | 9,101      | ML        | (18,(17,((16,(14,15))),((4,(13,(0,(3,2,1))),((9,(10,11)),(12,(8,(5,(6,7)))))))));   |
|     |            | MP        | (18,(5,((17,(16,(14,15))),((4,((2,3),(1,0))),(13,((12,(10,11)),(9,(6,(7,8))))))))); |
| 31  | 3,546      | ML        | (18,(17,((16,(14,15))),((4,(13,(0,(3,2,1))),(12,((10,(9,11)),(5,(8,(6,7)))))))));   |
|     |            | MP        | (18,(17,((15,(13,14))),((5,(4,(3,(1,(2,0))),(6,((12,(10,11)),(16,(9,(7,8)))))))));  |
| 32  | 6,854      | ML        | (18,(17,((15,(13,14))),((4,(5,(3,(1,(2,0))),(6,((12,(10,11)),(16,(9,(7,8)))))))));  |
|     |            | MP        | (18,((16,(14,15)),(17,((4,(13,(0,(3,2,1))),(12,((9,(10,11)),(5,(8,(6,7)))))))));    |
| 33  | 2,118      | ML        | (18,(17,((16,(14,15)),(12,((13,(4,(2,(1,(3,0))),((9,(10,11)),(5,(8,(6,7)))))))));   |
|     |            | MP        | (18,(17,((16,(14,15)),(12,((4,(13,(0,(3,2,1))),((11,(9,10)),(5,(6,(7,8)))))))));    |
| 34  | 1,271      | ML        | (18,(17,((16,(14,15))),((13,(4,(2,(1,(3,0))),(12,((11,(9,10)),(5,(8,(6,7)))))))));  |
|     |            | MP        | (18,(5,(8,(6,7))),((12,(17,(16,(14,15))),((11,(9,10)),(13,(4,(1,0,3,2))))));        |
| 35  | 8,075      | ML        | (18,(17,((16,(14,15))),((13,(4,(2,(1,(3,0))),(12,((9,(10,11)),(5,(8,(6,7)))))))));  |
|     |            | MP        | (18,(12,((17,(16,(14,15))),((4,(13,(0,(1,3,2))),((11,(9,10)),(5,(6,(7,8)))))))));   |
| 36  | 13,650     | ML        | (18,((14,(17,(15,16))),(13,((12,(4,((2,3),(1,0))),((10,(9,11)),(5,(7,(6,8))))))))); |
|     |            | MP        | (18,((16,(14,15)),(17,(12,((5,(6,(7,8))),((10,(9,11)),(4,(13,(0,(2,(1,3)))))))));   |

Table S1: Vibrionaceae 19–taxon large chromosome dataset LCBs and trees (continued).

| LCB | Aligned bp | Algorithm | Tree topologies (Newick)                                                            |
|-----|------------|-----------|-------------------------------------------------------------------------------------|
| 37  | 4,652      | ML        | (18,(17,((16,(14,15)),((4,(13,(0,(1,3,2))))),(12,((10,(9,11)),((6,7),(5,8))))))));  |
|     |            | MP        | (18,((17,(15,16)),(((14,(12,13)),(7,(8,(9,10))))),(6,11),(5,(4,((1,3),(2,0)))))))); |
| 38  | 8,966      | ML        | (18,((10,(9,11)),((13,(0,(2,3,1))),((5,(8,(6,7))),(4,(12,(17,(16,(14,15))))))));    |
|     |            | MP        | (18,((17,(15,16)),(((14,(12,13)),(7,(10,(8,9))))),(6,11),(5,(4,((1,3),(2,0)))))))); |
| 39  | 6,294      | ML        | (18,((17,(16,(14,15))),((10,(9,11)),(12,((7,8),(5,6)),(4,(13,(0,(2,1,3))))))));     |
|     |            | MP        | (18,(17,((15,(13,14)),(16,((5,(4,((1,3),(2,0))))),(12,(10,11)),(6,(7,(8,9))))))));  |
| 40  | 13,163     | ML        | (18,((4,(13,(0,(3,1,2))))),(10,(9,11)),(8,(7,(5,6))),(12,(17,(16,(14,15))))))));    |
|     |            | MP        | (18,(14,(13,(15,(16,(17,(11,(12,((0,(3,(1,2))))),(9,(8,10)),(4,(6,(5,7))))))));     |
| 41  | 35,664     | ML        | (18,(17,((16,(14,15)),(12,((4,(13,(2,(0,(1,3))))),(9,(10,11)),(5,(6,(7,8))))))));   |
|     |            | MP        | (18,(14,(13,(15,(16,(17,(11,(12,((0,(3,(1,2))))),(8,(9,10)),(4,(6,(5,7))))))));     |
| 42  | 3,886      | ML        | (18,((2,(0,(1,3))),4,(13,((17,(16,(14,15))),12,((11,(9,10)),5,(6,(7,8))))))));      |
|     |            | MP        | (18,((16,17),(15,((4,(5,13))),14,((2,3),(1,0))),12,(10,11)),9,(6,(7,8))))))));      |
| 43  | 5,522      | ML        | (18,((10,(9,11)),13,(4,((0,2,3,1)),12,(5,((8,(6,7)),17,(16,(14,15))))))));          |
|     |            | MP        | (18,((16,17),(15,((4,(5,13))),14,(3,(1,(2,0))))),(12,(10,11)),9,(6,(7,8))))))));    |
| 44  | 6,663      | ML        | (18,(17,((16,(14,15)),12,(4,(13,(3,2,0,1))),10,(9,11)),5,(7,(6,8))))))));           |
|     |            | MP        | (18,((16,(14,15)),(6,17),(0,(2,(1,3))),9,(5,(7,8))),13,(4,(12,(10,11))))))));       |
| 45  | 9,340      | ML        | (18,((17,(16,(14,15))),12,(5,(8,(6,7))),11,(9,10)),4,(13,(1,0,3,2))))))));          |
|     |            | MP        | (18,((16,(14,15)),(6,17),(0,(2,(1,3))),9,(5,(7,8))),13,(4,(11,(10,12))))))));       |
| 46  | 27,388     | ML        | (18,((4,(13,(0,(2,(1,3))))),(11,(9,10)),(8,(6,(5,7))),17,(12,(16,(14,15))))))));    |
|     |            | MP        | (18,((13,(15,16)),((11,(9,10)),4,(6,(5,7))),14,(17,(12,(8,((1,3),(2,0))))))));      |
| 47  | 8,922      | ML        | (18,((17,(16,(14,15))),12,(4,(13,(10,(9,11))),6,(5,(7,8))),0,(3,1,2))))))));        |
|     |            | MP        | (18,((13,(15,16)),((11,(9,10)),7,(4,(5,6))),14,(17,(12,(8,((1,3),(2,0))))))));      |
| 48  | 11,129     | ML        | (18,(17,(12,((16,(14,15)),(5,(7,(6,8))),9,(10,11)),4,(13,(3,0,1,2))))))));          |
|     |            | MP        | (18,((17,(16,(14,15))),10,(9,(7,8))),11,(12,13)),6,(5,(4,(2,(3,(1,0))))))));        |
| 49  | 18,293     | ML        | (18,((17,(16,(14,15))),12,(5,(7,(6,8))),10,(9,11)),4,(13,((1,3),(0,2))))))));       |
|     |            | MP        | (18,((17,(16,(14,15))),10,(9,(7,8))),13,(11,12)),6,(5,(4,(2,(3,(1,0))))))));        |
| 50  | 7,656      | ML        | (18,((17,(16,(14,15))),4,(13,((1,3),(0,2))),12,((10,(9,11)),(5,8),(6,7))))))));     |
|     |            | MP        | (18,((17,(10,(8,(4,5))),16,(14,15)),12,(1,2),(3,0)),13,((6,7),(9,(11,12))))))));    |
| 51  | 18,272     | ML        | (18,(17,((16,(14,15)),4,(13,(0,(1,2,3))),12,((11,(9,10)),5,(8,(6,7))))))));         |
|     |            | MP        | (18,((17,(10,(5,(4,8))),16,(14,15)),12,(1,2),(3,0)),13,((6,7),(9,(11,12))))))));    |
| 52  | 23,997     | ML        | (18,((17,(16,(14,15))),12,((4,(13,(0,(1,3,2))))),(10,(9,11)),5,(8,(6,7))))))));     |
|     |            | MP        | (18,((17,(16,(14,15))),((0,(1,(2,3))),4,(5,(13,((12,(10,11)),6,(9,(7,8))))))));     |
| 53  | 8,188      | ML        | (18,(17,((16,(14,15)),4,(12,(5,(8,(6,7))),9,(10,11)),13,(0,3,1,2))))))));           |
|     |            | MP        | (18,((17,(16,(14,15))),((0,(1,(2,3))),4,(5,(13,((11,(10,12)),6,(9,(7,8))))))));     |
| 54  | 27,651     | ML        | (18,((4,(12,(17,(16,(14,15))),13,((1,3),(0,2))),9,(10,11)),8,(5,(6,7))))))));       |
|     |            | MP        | (18,((16,17),(6,(9,(7,8))),13,((10,15),(14,(11,12))),5,(4,((2,3),(1,0))))))));      |
| 55  | 8,887      | ML        | (18,((17,(16,(14,15))),12,((4,(13,(0,(2,(1,3))))),(10,(9,11)),5,(7,(6,8))))))));    |
|     |            | MP        | (18,((16,17),(6,(9,(7,8))),13,((10,15),(14,(11,12))),5,(4,(2,(3,(1,0))))))));       |
|     |            | ML        | (18,(1,3,((0,2),(13,((4,(12,(17,(16,(14,15))))),(10,(9,11)),8,(7,(5,6))))))));      |

Table S1: Vibrionaceae 19–taxon large chromosome dataset LCBs and trees (continued).

| LCB | Aligned bp | Algorithm | Tree topologies (Newick)                                                        |
|-----|------------|-----------|---------------------------------------------------------------------------------|
| 56  | 18,231     | MP        | (18,((16,17),(6,(9,(7,8))),13,(((10,15),(14,(11,12))),5,(4,(0,(1,(2,3))))))));  |
|     |            | ML        | (18,((17,(16,(14,15))),((9,(10,11)),(5,(8,(6,7))),12,(4,(13,((1,3),(0,2))))));  |
| 57  | 9,123      | MP        | (18,((17,(16,(14,15))),((13,(4,(2,3),(1,0))),12,((9,(10,11)),5,(6,(7,8))))));   |
|     |            | ML        | (18,((11,(9,10)),(4,(13,(0,(2,(1,3))))),(5,(6,(7,8))),12,(17,(16,(14,15)))));   |
| 58  | 2,751      | MP        | (18,((17,(16,(14,15))),((13,(4,(2,(3,(1,0))))),12,((9,(10,11)),5,(6,(7,8)))))); |
|     |            | ML        | (18,((13,(0,(1,3,2))),((17,(16,(14,15))),12,(5,((6,7),(8,(4,(10,(9,11))))))));  |
| 59  | 2,222      | MP        | (18,((17,(16,(14,15))),((13,(4,(0,(1,(2,3))))),12,((9,(10,11)),5,(6,(7,8)))))); |
|     |            | ML        | (18,((0,(3,1,2)),(13,(17,(16,(14,15))),((4,(11,(9,10))),12,(7,(5,(6,8))))));    |
| 60  | 4,774      | MP        | (18,(17,((5,(4,(3,(2,(1,0))))),(16,(14,15)),10,((13,(11,12)),8,(7,(6,9))))));   |
|     |            | MP        | (18,(17,((5,(4,(3,(2,(1,0))))),(16,(14,15)),10,((11,(12,13)),8,(7,(6,9))))));   |
|     |            | ML        | (18,((10,(9,11)),(5,(7,(6,8))),((17,(16,(14,15))),12,(4,(13,(3,(2,0,1))))));    |
| 61  | 2,157      | MP        | (18,(17,((16,(14,15)),13,((5,(4,(2,(1,(3,0))))),12,(10,11)),6,(9,(7,8))))));    |
|     |            | ML        | (18,((16,(14,15)),17,(12,((4,(13,(0,1,2,3))),9,(10,11)),5,(6,(7,8))))));        |
| 62  | 9,904      | MP        | (18,(17,((16,(14,15)),13,((5,(4,(0,(3,(1,2))))),12,(10,11)),6,(9,(7,8))))));    |
|     |            | ML        | (18,(17,((16,(14,15)),(4,(13,(0,(3,2,1))),12,(10,(9,11)),5,(8,(6,7))))));       |
| 63  | 2,266      | MP        | (18,((16,(14,15)),17,((5,(4,(0,(1,(2,3))))),13,((11,(10,12)),6,(9,(7,8))))));   |
|     |            | ML        | (18,((0,(2,1,3)),13,((4,(12,(17,(16,(14,15))))),9,(10,11)),7,(8,(5,6))))));     |
| 64  | 2,722      | MP        | (18,((16,(14,15)),17,((5,(4,(0,(1,(2,3))))),13,((12,(10,11)),6,(9,(7,8))))));   |
|     |            | ML        | (18,(13,((0,(3,2,1)),4,((17,(16,(14,15))),10,(9,11)),12,(8,(7,(5,6))))));       |
| 65  | 1,014      | MP        | (18,((17,(16,(14,15))),13,((5,(4,(0,(3,(1,2))))),10,(11,12)),6,(9,(7,8))))));   |
|     |            | ML        | (18,((13,(0,(2,3,1))),4,((12,(17,(16,(14,15))),10,(9,11)),5,(8,(6,7))))));      |
| 66  | 12,082     | MP        | (18,(14,(17,((15,16)),5,(13,(9,(6,(8,(7,(10,(11,12))),4,(0,(2,(1,3))))))));     |
|     |            | ML        | (18,((17,(16,(14,15))),((13,(4,(0,(2,1,3))))),12,((11,(9,10)),5,(6,(7,8))))));  |
| 67  | 8,773      | MP        | (18,((16,17),(4,(15,(14,(13,((7,(5,6)),8,(10,(9,11)),12,(0,(1,(2,3))))))));     |
|     |            | ML        | (18,((17,(16,(14,15))),12,((4,(13,(3,0,2,1))),10,(9,11)),5,(8,(6,7))))));       |
| 68  | 5,049      | MP        | (18,(14,((16,(15,17)),7,(8,((5,6)),10,(11,12)),9,(13,(4,(3,(0,(1,2))))))));     |
|     |            | ML        | (18,((17,(16,(14,15))),((8,(5,(6,7))),12,((11,(9,10)),4,(13,(0,(3,1,2))))));    |
| 69  | 1,146      | MP        | (18,((10,(11,12)),4,(9,(8,(7,(6,(13,((17,(16,(14,15))),5,(3,(0,(1,2))))))));    |
|     |            | ML        | (18,((11,(9,10)),((17,(16,(14,15))),((8,(12,(6,(5,7))),4,(13,(3,1,0,2))))));    |
| 70  | 19,144     | MP        | (18,(13,(12,(8,(6,(9,(10,11))),7,((4,5),(16,(14,15)),17,(0,(3,(1,2))))))));     |
|     |            | ML        | (18,((13,(0,(3,2,1))),4,((10,(9,11)),(5,(8,(6,7))),12,(17,(16,(14,15))))));     |
| 71  | 11,033     | MP        | (18,((17,(15,16)),14,(8,((6,7),(9,((12,(10,11)),13,(4,(5,(2,(3,(1,0))))))));    |
|     |            | ML        | (18,((17,(16,(14,15))),((4,(13,(0,(2,(1,3))))),12,((9,(10,11)),5,(8,(6,7)))))); |
| 72  | 7,215      | MP        | (18,((17,(16,(14,15))),((9,(10,11)),12,(5,(7,(6,(8,(13,(4,(0,(3,(1,2))))))));   |
|     |            | ML        | (18,((17,(16,(14,15))),12,((4,(13,(0,(3,1,2))),10,(9,11)),5,(8,(6,7))))));      |
| 73  | 5,633      | MP        | (18,((7,(5,6)),10,(11,(12,(9,(13,(4,(8,((17,(16,(14,15))),0,(3,(1,2))))))));    |
|     |            | ML        | (18,((16,(14,15)),17,((4,(13,(2,0,1,3))),12,((9,(10,11)),8,(7,(5,6))))));       |
| 74  | 6,206      | MP        | (18,(17,(8,(7,(6,(5,((13,(14,15))),12,(11,(9,10))),16,(4,(0,(2,(1,3))))))));    |
|     |            | MP        | (18,((16,(14,15)),8,(9,((0,(3,(1,2))),13,(6,(5,(7,(4,(17,(12,(10,11))))))));    |

Table S1: Vibrionaceae 19–taxon large chromosome dataset LCBs and trees (continued).

| LCB | Aligned bp | Algorithm | Tree topologies (Newick)                                                          |
|-----|------------|-----------|-----------------------------------------------------------------------------------|
| 75  | 4,986      | ML        | (18,((1,0,2,3),(13,(4,((10,(9,11)),(7,(8,(6,(5,(12,(17,(16,(14,15))))))))))));    |
|     |            | MP        | (18,((0,(2,(1,3))),5,((16,(14,15)),(4,(13,(17,(9,(7,(6,(8,(12,(10,11)))))))))))); |
| 76  | 6,270      | ML        | (18,(6,(5,7),(8,((10,(9,11)),(12,(17,(16,(14,15))),4,(13,(0,(1,2,3))))))));       |
|     |            | MP        | (18,(13,((8,(9,10)),(6,(4,(5,(7,(11,(12,(17,(16,(14,15))),1,(0,(2,3))))))))));    |
| 77  | 5,818      | ML        | (18,((16,(14,15)),(17,(12,((4,(13,(0,(2,(1,3))))),(11,(9,10)),(8,(5,(6,7)))))))); |
|     |            | MP        | (18,(13,((2,(1,(3,0))),4,((11,(9,10)),(7,8),(6,(5,(12,(14,(17,(15,16))))))))));   |
| 78  | 2,713      | ML        | (18,(17,(12,((11,(9,10)),(8,(7,(5,6))),4,(16,(14,15))),13,(3,0,1,2))))));         |
|     |            | MP        | (18,((16,17),(15,(14,((5,(6,(7,8))),((11,(9,10)),12,(13,(4,(3,(2,(1,0))))))))));  |
| 79  | 7,416      | ML        | (18,(13,((3,(1,0,2)),4,((12,(17,(16,(14,15))),((11,(9,10)),5,(6,(7,8))))))));     |
|     |            | MP        | (18,((17,(16,(14,15))),12,((10,(8,9)),4,(7,((5,6),(11,(13,(0,(3,(1,2))))))))));   |
| 80  | 1,908      | ML        | (18,((4,(1,0,3,2)),13,((12,(17,(16,(14,15))),9,(10,11)),7,(8,(5,6))))));          |
|     |            | MP        | (18,((16,17),(13,(10,(15,((8,9),(12,((6,(5,7)),4,(11,14)),3,(2,(1,0))))))))));    |
| 81  | 6,785      | ML        | (18,((17,(16,(14,15))),4,(13,(0,1,2,3))),12,((10,(9,11)),5,(8,(6,7))))));         |
|     |            | MP        | (18,((17,(16,(14,15))),13,((10,(11,12)),(7,8),(6,(9,(5,(4,(0,(3,(1,2))))))))));   |
| 82  | 11,551     | ML        | (18,(12,((10,(9,11)),5,(7,(6,8))),17,(16,(14,15))),4,(13,(0,1,3,2))))));          |
|     |            | MP        | (18,(4,(9,(1,(2,(3,0))),8,(5,((6,7),(12,(10,11)),17,(16,(15,(13,14))))))))));     |
| 83  | 3,374      | ML        | (18,(17,(16,(14,15)),12,((4,(13,(0,2,(1,3))),10,(9,11)),5,(6,(7,8))))));          |
|     |            | MP        | (18,(4,((12,(17,(16,(14,15))),9,(11,(10,(8,(7,(5,6)),13,(1,(0,(2,3))))))))));     |
| 84  | 4,934      | ML        | (18,((17,(16,(14,15))),12,((4,(13,(2,0,3,1)),9,(10,11)),5,(8,(6,7))))));          |
|     |            | MP        | (18,((1,3),(2,0)),17,(14,(12,13))),11,(7,(15,(16,(6,(4,(5,(10,(8,9))))))))));     |
| 85  | 3,660      | ML        | (18,(17,(16,(14,15)),4,(13,(0,3,2,1)),12,((9,(10,11)),5,(8,(6,7))))));            |
|     |            | MP        | (18,(17,(16,(14,15)),6,((7,(8,9)),11,(10,12)),13,(5,(4,(0,(3,(1,2))))))))));      |
| 86  | 4,925      | ML        | (18,(3,1,0,2,(4,(13,((12,(17,(16,(14,15))),10,(9,11)),5,(7,(6,8))))));            |
|     |            | MP        | (18,((14,15),(16,(17,(10,(5,((0,(1,2,3))),4,(11,(12,13)),6,(9,(7,8))))))))));     |
| 87  | 2,649      | ML        | (18,(5,((8,(6,7)),11,(9,10)),12,(4,((17,(16,(14,15))),13,(3,1,0,2))))));          |
|     |            | MP        | (18,(16,(17,((14,15)),13,((6,(5,(7,8))),11,(9,10)),12,(4,(0,(2,(1,3))))))))));    |
| 88  | 11,448     | ML        | (18,(4,((1,0,2,3),(13,(8,(10,(9,11))),17,(16,(14,15))),12,(5,(6,7))))));          |
|     |            | MP        | (18,((14,15),(11,((0,(1,2,3))),5,(12,(6,(7,((10,(8,9)),17,(13,(4,16))))))))));    |
| 89  | 1,095      | ML        | (18,((11,(9,10)),5,(7,(6,8))),12,(17,(16,(14,15))),4,(13,(0,(3,2,1))))));         |
|     |            | MP        | (18,((4,(2,(1,(3,0))),17,(13,((16,(14,15)),12,(8,(7,(6,(5,(9,(10,11))))))))));    |
| 90  | 36,613     | ML        | (18,(17,(16,(14,15)),13,(1,0,2,3)),4,(12,((11,(9,10)),5,(7,(6,8))))));            |
|     |            | MP        | (18,((17,(16,(14,15))),9,(8,(7,((5,6),(12,(10,11)),13,(4,(1,(3,(2,0))))))))));    |
| 91  | 68,050     | ML        | (18,(17,((6,(8,(5,7))),12,(16,(14,15))),11,(9,10)),4,(13,(0,2,3,1))))));          |
|     |            | MP        | (18,(17,(12,((11,(9,10)),5,((6,(7,8)),16,(14,15)),13,(4,(3,(0,(1,2))))))))));     |
| 92  | 13,435     | ML        | (18,(17,((16,(14,15)),4,(13,(2,0,3,1))),12,((11,(9,10)),7,(8),(5,6))))));         |
|     |            | MP        | (18,((16,17),(12,(10,11)),14,(13,(9,(6,(7,8))),15,(5,(4,(0,(1,2,3))))))))));      |
| 93  | 15,616     | ML        | (18,((17,(16,(14,15))),12,(5,(6,(7,8))),9,(10,11)),4,(13,(0,(2,(1,3))))));        |
|     |            | MP        | (18,((16,(14,15)),17,(13,(9,((6,(7,8)),12,(10,11)),4,(5,(0,(2,(1,3))))))))));     |
|     |            | ML        | (18,((0,3,1,2),(4,(13,((17,(16,(14,15))),12,((11,(9,10)),8,(6,(5,7))))))))));     |

Table S1: Vibrionaceae 19–taxon large chromosome dataset LCBs and trees (continued).

| LCB | Aligned bp | Algorithm | Tree topologies (Newick)                                                              |
|-----|------------|-----------|---------------------------------------------------------------------------------------|
| 94  | 18,040     | MP        | (18,(15,(14,(16,(17,((4,((2,3),(1,0))),((13,(11,12)),(10,(8,(6,(5,(7,9))))))))))));   |
|     |            | ML        | (18,((17,(16,(14,15))),((12,((4,(13,(0,(1,2,3))),((10,(9,11)),(8,(5,(6,7))))))))));   |
| 95  | 6,918      | MP        | (18,(15,((14,(12,13)),((10,(8,9)),(7,((11,17),(4,((5,6),(16,(0,(1,(2,3))))))))))));   |
|     |            | ML        | (18,(17,((16,(14,15)),((5,(8,(6,7))),((12,((10,(9,11)),(4,(13,(2,0,3,1))))))))));     |
| 96  | 4,559      | MP        | (18,((16,17),(14,(15,(13,((5,(4,(2,(1,(3,0))))),((12,(10,11)),(6,(9,(7,8))))))))));   |
|     |            | ML        | (18,(5,((7,(6,8)),((4,(13,(0,(1,2,3))),((12,((11,(9,10)),(17,(16,(14,15))))))))));    |
| 97  | 8,226      | MP        | (18,(17,((16,(14,15)),(12,((11,(8,(9,10))),((7,(5,6)),(13,(4,(0,(1,(2,3))))))))));    |
|     |            | ML        | (18,(17,((16,(14,15)),((4,12),((13,(0,1,2,3)),((11,(9,10)),(5,(6,(7,8))))))))));      |
| 98  | 52,599     | MP        | (18,(17,((16,(14,15)),(12,((11,(9,10)),((0,(2,(1,3))),(4,(13,(5,(8,(6,7))))))))));    |
|     |            | ML        | (18,((1,0,2,3),(13,(4,((9,(10,11)),((6,(7,(5,8))),((12,(17,(16,(14,15))))))))));      |
| 99  | 10,475     | MP        | (18,(17,((2,(1,(3,0))),(8,(12,(13,(6,((4,(5,7)),((11,(9,10)),(16,(14,15))))))))));    |
|     |            | ML        | (18,(17,((16,(14,15)),(12,((4,(13,(0,(1,3,2))),((9,(10,11)),(5,(8,(6,7))))))))));     |
| 100 | 3,918      | MP        | (18,(17,((16,(14,15)),(12,(10,11)),((9,(8,(6,7))),(13,(5,(4,(0,(3,(1,2))))))))));     |
|     |            | ML        | (18,(5,(6,(7,8)),((10,(9,11)),((12,(17,(16,(14,15))),((4,13),(0,(2,3,1))))))))));     |
| 101 | 18,186     | MP        | (18,(17,((16,(14,15)),(9,(5,((8,(6,7)),((12,(10,11)),(13,(4,(2,3),(1,0))))))))));     |
|     |            | ML        | (18,((17,(16,(14,15))),((4,(13,(1,0,2,3))),((12,((11,(9,10)),(5,(7,(6,8))))))))));    |
| 102 | 4,439      | MP        | (18,(17,((16,(14,15)),(13,(9,((0,(3,(1,2))),(4,((11,(10,12)),(8,(7,(5,6))))))))));    |
|     |            | ML        | (18,(16,((14,15),(12,((5,(8,(6,7))),((10,(9,11)),((4,17),(13,(0,(2,3,1))))))))));     |
| 103 | 4,574      | MP        | (18,(16,((17,(14,15)),(13,((5,(6,(7,8))),((9,(10,11)),(12,(4,(3,(1,(2,0))))))))));    |
|     |            | MP        | (18,((14,15),(16,(17,((10,(8,9)),(4,(7,(5,6))),((11,(12,(13,(1,(3,(2,0))))))))));     |
|     |            | ML        | (18,(13,(0,(2,3,1)),(4,((12,(17,(16,(14,15))),((11,(9,10)),(5,(7,(6,8))))))))));      |
| 104 | 9,325      | MP        | (18,((16,17),(15,((8,(6,7)),((11,(12,(9,10))),((5,13),(14,(4,(0,(3,(1,2))))))))));    |
|     |            | ML        | (18,(15,(14,((16,17)),((4,(13,(3,(0,1,2))),((10,(9,11)),(5,(6,(7,(8,12))))))))));     |
| 105 | 37,144     | MP        | (18,((15,(13,14)),(9,(17,(16,(4,((5,(3,(0,(1,2))),((6,(7,8)),(12,(10,11))))))))));    |
|     |            | ML        | (18,((0,(1,3,2)),(4,(13,((17,(16,(14,15))),((12,((10,(9,11)),(5,(8,(6,7))))))))));    |
| 106 | 3,855      | MP        | (18,(17,((16,(14,15)),((9,(6,(7,8))),((11,(10,12)),(13,(5,(4,(1,(0,(2,3))))))))));    |
|     |            | ML        | (18,(12,((17,(16,(14,15))),((5,((6,8),(7,((11,(9,10)),(4,(13,(0,2,1,3))))))))));      |
| 107 | 19,284     | MP        | (18,(16,(8,((7,(5,6)),((12,(17,(14,15))),(13,((11,(9,10)),(4,(3,(1,(2,0))))))))));    |
|     |            | ML        | (18,((13,(4,(0,(3,1,2))),((12,(17,(16,(14,15))),((10,(9,11)),(5,(8,(6,7))))))))));    |
| 108 | 19,382     | MP        | (18,(17,((11,(9,10)),(5,(13,(4,((3,(0,(1,2))),((12,((8,(6,7)),(16,(14,15))))))))));   |
|     |            | ML        | (18,((4,(13,(0,(2,3,1))),((9,(10,11)),(17,16,(14,15)),(12,(5,(8,(6,7))))))))));       |
| 109 | 27,162     | MP        | (18,((16,17),(14,(15,(13,((5,(4,(1,(3,(2,0))))),((12,(10,11)),((6,7),(8,9))))))))));  |
|     |            | ML        | (18,((17,(16,(14,15))),((12,((8,(6,(5,7))),((10,(9,11)),(4,(13,(0,(3,1,2))))))))));   |
| 110 | 8,639      | MP        | (18,(11,((14,(12,13)),((9,(6,(7,8))),((10,((17,(15,16)),(5,(4,(1,(2,(3,0))))))))));   |
|     |            | ML        | (18,(17,((16,(14,15)),((6,(5,7)),(11,(9,10))),((8,12),(4,(13,(0,2,1,3))))))))));      |
| 111 | 37,180     | MP        | (18,(14,((17,(15,16)),(13,(5,(4,((1,(3,(2,0))),((8,(6,7)),(12,(11,(9,10))))))))));    |
|     |            | ML        | (18,((17,(16,(14,15))),((4,(13,((1,3),(0,2))),((12,((10,(9,11)),(5,(6,(7,8)))))))))); |
| 112 | 8,583      | MP        | (18,(17,((16,(14,15)),((9,(7,(6,8))),(13,((11,(10,12)),(5,(4,(0,(3,(1,2))))))))));    |
|     |            | ML        | (18,((17,(16,(14,15))),((13,(4,(0,(2,(1,3))),((12,((9,(10,11)),(5,(6,(7,8))))))))));  |

Table S1: Vibrionaceae 19–taxon large chromosome dataset LCBs and trees (continued).

| LCB | Aligned bp | Algorithm      | Tree topologies (Newick)                                                                                                                                                                                                                                            |
|-----|------------|----------------|---------------------------------------------------------------------------------------------------------------------------------------------------------------------------------------------------------------------------------------------------------------------|
| 113 | 1,132      | MP<br>ML       | (18,((17,(15,16)),(14,(5,(13,((9,(7,(6,8))),((11,(10,12)),(4,(0,(3,(1,2))))))))))));<br>(18,((17,(12,((7,8),(5,6))),((4,(13,(16,(14,15))))),((11,(9,10)),(0,(2,1,3))))));                                                                                           |
| 114 | 14,588     | MP<br>ML       | (18,((16,(14,15)),(17,((13,(11,12)),((8,(6,(7,9))),((10,(5,(4,(1,(3,(2,0))))))))))));<br>(18,(17,((16,(14,15)),(12,((4,(13,(0,(3,2,1))))),((10,(9,11)),(5,(6,(7,8))))))));                                                                                          |
| 115 | 32,461     | MP<br>ML       | (18,(17,((16,(14,15)),(13,((12,(11,(9,10))),((8,(6,7)),(5,(4,(0,(2,(1,3))))))))));<br>(18,((17,(16,(14,15))),((4,(13,(0,(2,(1,3))))),((12,(10,(9,11))),(5,(7,(6,8))))));                                                                                            |
| 116 | 70,298     | MP<br>ML       | (18,(17,((16,(14,15))),((0,(2,(1,3))),((12,(10,11))),((9,(7,(8,(6,(13,(4,5))))))))));<br>(18,((17,(16,(14,15))),((4,(13,(0,(1,2,3))))),((12,((11,(9,10)),(5,(8,(6,7))))))));                                                                                        |
| 117 | 12,581     | MP<br>ML       | (18,(17,((1,(2,(3,0))),((11,(9,10)),(13,((16,(14,15)),(6,(7,(8,(5,(4,12))))))))));<br>(18,((17,(16,(14,15))),((4,(13,(0,(3,2,1))))),((12,((9,(10,11)),(5,(6,(7,8))))))));                                                                                           |
| 118 | 22,480     | MP<br>MP<br>ML | (18,(14,((17,(15,16)),((11,(10,12)),((9,(8,(6,7))),((13,(5,(4,(0,(3,(1,2))))))))));<br>(18,(4,((13,(11,12)),(14,((7,8),(9,10)),((17,(15,16)),(6,(5,(0,(1,(2,3))))))))));<br>(18,(17,((16,(14,15))),((4,(13,(2,0,(1,3))))),((12,((10,(9,11))),(5,(8,(6,7))))));      |
| 119 | 2,810      | MP<br>ML       | (18,(17,((16,(14,15)),(4,((0,(3,(1,2))),((13,(9,(8,((7,(5,6))),((12,(10,11))))))))));<br>(18,(17,((16,(14,15)),(12,((11,(9,10)),((5,(8,(6,7))),((4,(13,(0,1,3,2))))))))));                                                                                          |
| 120 | 8,667      | MP<br>ML       | (18,(17,((16,(14,15)),((3,(1,(2,0))),((4,(5,(13,((12,(10,11))),((9,(8,(6,7))))))))));<br>(18,((17,(16,(14,15))),((12,((4,(13,(0,2,3,1))),((9,(10,11))),((8,(5,(6,7))))))));                                                                                         |
| 121 | 14,205     | MP<br>ML       | (18,(13,(17,((16,(14,15)),(12,((5,(8,(6,7))),((11,(9,10)),(4,(0,(1,(2,3))))))))));<br>(18,(13,((0,(3,1,2)),(4,(12,((17,(16,(14,15))),((10,(9,11))),((6,8),(5,7))))))));                                                                                             |
| 122 | 13,045     | MP<br>ML       | (18,((16,(14,15)),(9,(5,((0,(1,(2,3))),((4,((8,(6,7))),((17,(13,(11,(10,12))))))))));<br>(18,(12,(17,(16,(14,15))),((4,(13,(0,(2,(1,3))))),((9,(10,11))),((5,(7,(6,8))))));                                                                                         |
| 123 | 16,276     | MP<br>ML       | (18,(17,((16,(14,15)),((12,(10,11)),((6,(7,(8,9))),((13,(5,(4,(3,(2,(1,0))))))))));<br>(18,(12,((17,(16,(14,15))),((5,(7,(6,8))),((4,((13,(10,(9,11))),((0,(3,1,2))))))));                                                                                          |
| 124 | 4,509      | MP<br>ML       | (18,(17,((15,16),(14,(13,((5,(4,(0,(1,(2,3))))),((12,(10,11))),((9,(7,(6,8))))))))));<br>(18,(((4,16),(17,(13,(0,(2,1,3))))),((12,(14,15))),((9,(10,11))),((5,(6,(7,8))))));                                                                                        |
| 125 | 2,681      | MP<br>ML       | (18,(((2,3),(1,0)),(4,(13,(17,(12,((7,(6,8)),(5,((10,(9,11))),((16,(14,15))))))))));<br>(18,(17,(16,(14,15))),((13,(2,0,1,3)),((10,(9,11))),((4,12),(5,(7,(6,8))))));                                                                                               |
| 126 | 15,355     | MP<br>ML       | (18,(13,((10,(8,9)),(14,((0,(3,(1,2))),((12,(11,((15,(16,17))),((4,(7,(5,6))))))))));<br>(18,(17,((16,(14,15))),((11,(9,10)),(5,(6,(7,8))),((12,(4,(13,(0,(2,3,1))))))))));                                                                                         |
| 127 | 4,661      | MP<br>ML       | (18,(14,(4,(5,(10,((6,(7,8))),((17,(15,16))),((9,(13,(11,12))),((1,2),(3,0))))))));<br>(18,(13,((0,(3,1,2)),(4,((17,(16,(14,15))),((12,((10,(9,11))),((5,(8,(6,7))))))))));                                                                                         |
| 128 | 1,950      | MP<br>ML       | (18,(16,((15,(13,14)),(12,((5,(8,(6,7))),((9,(10,11))),((4,(17,(2,(1,(3,0))))))))));<br>(18,(17,((16,(14,15)),(12,(8,(5,(6,7))),((10,(9,11))),((4,(13,(0,(1,2,3))))))))));                                                                                          |
| 129 | 10,960     | MP<br>MP<br>ML | (18,((17,(15,16)),(13,((11,(9,10)),((7,(8,(5,6))),((12,(14,(4,(0,(1,(2,3))))))))));<br>(18,(17,((16,(14,15))),(13,((9,(8,(6,7))),((12,(10,11))),((5,(4,(0,(3,(1,2))))))))));<br>(18,(17,(13,((0,(1,3,2)),(4,((12,(16,(14,15))),((11,(9,10))),((5,(8,(6,7)))))))))); |
| 130 | 4,163      | MP<br>ML       | (18,((5,(6,(7,8))),((15,(16,((12,(10,11))),((9,((17,(13,14))),((4,(3,(1,(2,0))))))))));<br>(18,((13,(0,(2,(1,3))),((4,((12,(17,(16,(14,15))),((10,(9,11))),((5,(8,(6,7))))))))));                                                                                   |
| 131 | 1,545      | MP             | (18,(17,(16,(4,(((1,2),(3,0)),(5,((13,(14,15))),((12,(10,11))),((6,(7,(8,9))))))))));                                                                                                                                                                               |

Table S1: Vibrionaceae 19-taxon large chromosome dataset LCBs and trees (continued).

| LCB | Aligned bp | Algorithm | Tree topologies (Newick)                                                                |
|-----|------------|-----------|-----------------------------------------------------------------------------------------|
| 132 | 2,576      | ML        | (18,(4,((13,(0,(2,(1,3))))),(17,(16,(14,15))),(12,((10,(9,11)),(5,(6,(7,8))))))));      |
|     |            | MP        | (18,(9,((12,(10,11)),(16,((0,(2,(1,3))),((17,(13,(14,15))),((8,(4,(5,(6,7))))))))));    |
| 133 | 2,054      | ML        | (18,((17,(16,(14,15))),((10,(9,11)),(5,(8,(6,7))),((12,(4,(13,(0,(2,3,1))))))));        |
|     |            | MP        | (18,((17,(15,(13,14))),((7,((4,(10,(8,9))),((5,(6,(16,(11,(12,(0,(3,(1,2))))))))))));   |
| 134 | 13,070     | ML        | (18,(17,((16,(14,15)),(12,((4,(13,(0,(3,2,1))))),(9,(10,11)),(5,(8,(6,7))))));          |
|     |            | MP        | (18,(17,((14,(12,13)),(16,((0,(2,(1,3))),((15,(11,((10,(8,9))),((4,(5,(6,7))))))))));   |
| 135 | 6,032      | MP        | (18,((17,(16,(14,15))),((13,((10,(8,9))),((7,((4,(5,6))),((11,(12,(0,(1,(2,3)))))))))); |
|     |            | ML        | (18,(17,((16,(14,15))),((0,3,2,1),(4,((12,13),((9,(10,11)),(5,(7,(6,8))))))));          |
| 136 | 3,416      | MP        | (18,(17,((16,(14,15)),(11,((4,(5,(6,7))),((10,(8,9))),(12,(13,(0,(2,(1,3))))))));       |
|     |            | ML        | (18,(17,((15,16),(14,(13,((5,(4,((1,2),(3,0))),((10,(11,12)),(9,(8,(6,7))))))))));      |
| 137 | 5,412      | MP        | (18,((17,(16,(14,15))),((9,(10,11)),(8,(6,(5,7))),((12,(4,(13,(2,0,1,3))))))));         |
|     |            | ML        | (18,((16,(14,15)),(4,(8,((7,(5,6))),((9,17),((13,(11,12)),(10,((2,3),(1,0))))))));      |
| 138 | 2,987      | MP        | (18,(17,((16,(14,15))),((12,(10,(9,11))),((5,(8,(6,7))),((4,(13,(0,1,2,3))))))));       |
|     |            | ML        | (18,(16,(17,((15,(13,14)),(12,((11,(0,(3,(1,2))),((10,(8,9))),((7,(6,(4,5))))))));      |
| 139 | 2,730      | MP        | (18,((0,3,2,1),(13,(4,((12,(17,(16,(14,15))),((10,(9,11)),(5,(7,(6,8))))))));           |
|     |            | ML        | (18,((11,((4,5),(10,(8,9))),((15,(13,14)),(17,(16,(12,(7,(6,((2,3),(1,0))))))))));      |
| 140 | 7,943      | MP        | (18,(4,((13,(0,3,1,2)),((17,(16,(14,15))),(12,((11,(9,10)),((7,8),(5,6))))))));         |
|     |            | ML        | (18,(17,((16,(14,15)),(13,((5,(4,(0,(3,(1,2))))),(11,(10,12)),(8,(9,(6,7))))))));       |
| 141 | 6,310      | MP        | (18,(4,((3,1,0,2),(13,((17,(16,(14,15))),(12,((10,(9,11)),(5,(6,(7,8))))))));           |
|     |            | ML        | (18,(17,((16,(14,15)),(13,((4,(5,(0,(2,(1,3))))),(12,(10,11)),(6,(8,(7,9))))))));       |
| 142 | 2,069      | MP        | (18,((0,2,1,3),(13,(4,((12,(17,(14,(15,16))),((9,(10,11)),(8,(5,(6,7))))))));           |
|     |            | ML        | (18,(17,((16,(14,15)),(13,((5,(4,(0,(3,(1,2))))),(12,(10,11)),(9,(6,(7,8))))))));       |
| 143 | 12,239     | MP        | (18,(17,((16,(14,15)),(12,((4,(13,(0,1,3,2))),((9,(10,11)),(5,(8,(6,7))))))));          |
|     |            | ML        | (18,(17,((16,(14,15)),(13,((5,(4,(0,(1,(2,3))))),(12,(10,11)),(6,(7),(8,9))))))));      |
| 144 | 12,487     | MP        | (18,(4,(13,((2,1,0,3),(12,((7,(5,(6,8))),((9,(10,11)),(17,(16,(14,15))))))));           |
|     |            | ML        | (18,(16,((8,(6,7)),((4,(0,(3,(1,2))),((5,(17,((13,(14,15)),(9,(10,(11,12))))))));       |
| 145 | 5,498      | MP        | (18,((17,(16,(14,15))),((4,(13,(1,3,0,2))),(12,((9,(10,11)),(8,(5,(6,7))))))));         |
|     |            | ML        | (18,(17,((16,(14,15)),(12,(13,((4,(0,(1,(2,3))),((10,(9,11)),(5,(8,(6,7))))))));        |
| 146 | 4,223      | MP        | (18,(17,((16,(14,15))),((9,10,11),(7,(5,(6,8))),((12,(4,(13,(0,2,1,3))))))));           |
|     |            | ML        | (18,(13,((16,(14,15)),(17,(8,((4,(0,(2,(1,3))),((5,(6,7)),(9,(12,(10,11))))))));        |
| 147 | 6,886      | MP        | (18,((12,(4,(13,(2,(0,(1,3))))),(17,(16,(14,15))),((9,(10,11)),(5,(8,(6,7))))))));      |
|     |            | ML        | (18,((16,(14,15)),(17,(10,((0,(2,(1,3))),((11,(12,13)),((4,5),(6,(9,(7,8))))))));       |
| 148 | 5,239      | MP        | (18,(17,((16,(14,15)),(4,(13,(0,2,1,3))),((12,(9,(10,11)),(5,(8,(6,7))))))));           |
|     |            | ML        | (18,((17,(16,(14,15))),((4,(13,(0,(3,1,2))),((12,(10,11)),(5,(4,(3,(1,(2,0))))))));     |
| 149 | 7,632      | MP        | (18,((17,(16,(14,15))),((4,(13,(0,(3,1,2))),((12,(11,(9,10)),(5,(6,(7,8))))))));        |
|     |            | ML        | (18,((13,(11,(9,10))),(12,((1,2),(3,0)),(17,((14,(15,16)),(7,(8,(4,(5,6))))))));        |
| 149 | 7,632      | MP        | (18,((17,(16,(14,15))),((4,(13,(0,(3,1,2))),((12,(10,(9,11)),(7,(6,(5,8))))))));        |
|     |            | ML        | (18,((17,(16,(14,15))),((0,(2,(1,3))),((4,(12,(13,((9,(10,11)),(8,(5,(6,7))))))));      |
|     |            | ML        | (18,((17,(16,(14,15))),(12,((4,(13,(3,0,2,1))),((9,(10,11)),(5,(8,(6,7))))))));         |



Table S1: Vibrionaceae 19–taxon large chromosome dataset LCBs and trees (continued).

| LCB | Aligned bp | Algorithm | Tree topologies (Newick)                                                            |
|-----|------------|-----------|-------------------------------------------------------------------------------------|
| 150 | 17,681     | MP        | (18,(17,((16,(14,15)),(10,((5,(4,(0,(2,(1,3))))))),(12,(11,13)),(6,(7,(8,9)))))))); |
|     |            | ML        | (18,((17,(16,(14,15))),((4,(13,(0,(2,(1,3))))),(12,((10,(9,11))),5,(7,(6,8)))))))); |
| 151 | 3,564      | MP        | (18,(((4,(5,6)),(12,(11,(9,10))),17,((16,(14,15)),(13,(7,(8,(3,(1,(2,0)))))))))     |
|     |            | MP        | (18,(17,((16,(14,15)),((12,(10,11)),((13,(6,(8,(7,9))))(5,(4,(1,(0,(2,3)))))))))    |
|     |            | ML        | (18,((17,(16,(14,15))),((8,(12,(5,(6,7))),((10,(9,11)),13,(4,(0,3,2,1))))))         |
| 152 | 4,675      | MP        | (18,(17,((16,(14,15)),(12,((13,(4,(0,(2,(1,3))))))),(9,(10,11)),5,(6,(7,8))))))     |
|     |            | MP        | (18,(8,(16,((11,(9,10))),17,((15,(4,(5,(6,7))))(14,(12,13)),2,(1,(3,0))))))         |
|     |            | ML        | (18,((17,(16,(14,15))),12,((4,(13,(0,(3,1,2))))(11,(9,10)),5,(8,(6,7))))))          |
| 153 | 21,898     | MP        | (18,((17,(16,(14,15))),12,((1,3),(2,0)),13,(4,((11,(9,10)),5,(7,(6,8))))))          |
|     |            | ML        | (18,(17,((16,(14,15)),12,((4,(13,(0,(2,(1,3))))(11,(9,10)),5,(8,(6,7))))))          |
| 154 | 8,162      | MP        | (18,((17,(15,16)),14,(12,((13,(11,(1,(3,(2,0))))(8,(9,10)),7,(6,(4,5))))))          |
|     |            | ML        | (18,((17,(16,(14,15))),((4,(13,(0,(3,2,1))))(12,((9,(10,11)),7,(8,(5,6))))))        |
| 155 | 12,301     | MP        | (18,(13,((17,(16,(14,15))),((9,(8,10)),((7,(5,(4,6))),12,(11,(0,(2,(1,3))))))       |
|     |            | ML        | (18,((12,(4,(13,(0,(2,(1,3))))(17,(16,(14,15))),9,(10,11)),5,(6,(7,8))))            |
| 156 | 6,664      | MP        | (18,((7,(4,(5,6))),17,(15,16)),13,((0,(2,(1,3))),8,(12,(14,(11,(9,10))))))          |
|     |            | ML        | (18,((17,(16,(14,15))),((4,(13,(0,(3,1,2))))(12,((10,(9,11)),8,(5,(6,7))))))        |
| 157 | 5,630      | MP        | (18,((14,(17,(15,16))),10,(9,(2,(1,(3,0))),8,(7,((5,6),(4,(13,(11,12))))))          |
|     |            | ML        | (18,(0,(3,1,2),(4,(13,((17,(16,(14,15))),12,((11,(9,10)),5,(8,(6,7))))))            |
| 158 | 7,687      | MP        | (18,(9,(8,(13,((17,(16,(14,15))),((2,(3,(1,0))),11,(10,12)),4,(5,(6,7))))))         |
|     |            | ML        | (18,(6,(8,(5,(7,((10,(9,11)),12,(17,((16,(14,15)),4,(13,(3,(2,1,0))))))             |
| 159 | 23,214     | MP        | (18,((10,(8,9)),(12,(3,(2,(1,0))),17,(6,(7,((5,(4,11)),16,(15,(13,14))))))          |
|     |            | ML        | (18,((17,(16,(14,15))),12,((4,(13,(0,(3,2,1))),11,(9,10)),(6,8),(5,7))))            |
| 160 | 7,274      | MP        | (18,(17,((16,(14,15)),13,((9,(6,(7,8))),12,(10,11)),(4,5),(3,(0,(1,2))))))          |
|     |            | ML        | (18,((1,0,2,3),(4,13),10,(9,11)),(6,(7,8)),5,(12,(17,(16,(14,15))))))               |
| 161 | 7,872      | MP        | (18,(17,((7,(5,6)),((0,(3,(4,(1,2))))(8,(12,(9,(10,11)),13,(16,(14,15))))))         |
|     |            | ML        | (18,(17,((16,(14,15)),4,((12,(5,(8,(6,7))))(11,(9,10)),13,(1,0,2,3))))              |
| 162 | 17,207     | MP        | (18,(17,((0,(3,(1,2))),12,(13,((11,(16,(14,15))),8,(9,10)),7,(4,(5,6))))))          |
|     |            | MP        | (18,(17,((16,(14,15)),8,((13,(12,(0,(3,(1,2))))(11,(9,10)),4,(7,(5,6))))))          |
|     |            | MP        | (18,((16,(14,15)),17,(12,((13,(4,(0,(2,(1,3))))(11,(9,10)),8,(7,(5,6))))))          |
|     |            | ML        | (18,((16,(14,15)),17,((8,(5,(6,7))),12,((9,(10,11)),4,(13,(0,2,(1,3))))))           |
| 163 | 7,476      | MP        | (18,(14,((17,(15,16)),13,((4,(5,(2,(3,(1,0))))(11,(10,12)),6,(8,(7,9))))))          |
|     |            | ML        | (18,((10,(9,11)),5,(6,(7,8))),12,((17,(16,(14,15))),4,(13,(2,0,3,1))))              |
| 164 | 17,343     | MP        | (18,(17,((16,(14,15)),10,(8,(9,((2,3),(1,0))),11,(12,13)),4,(6,(5,7))))))           |
|     |            | ML        | (18,(17,((16,(14,15)),((4,(13,(0,(3,2,1))))(12,((9,(10,11)),5,(8,(6,7))))))         |
| 165 | 4,416      | MP        | (18,((16,(14,15)),17,(12,((13,(4,(2,(3,(1,0))))(11,(9,10)),8,(7,(5,6))))))          |
|     |            | ML        | (18,(17,((16,(14,15))),4,(13,(0,1,3,2))),12,((11,(9,10)),5,(6,(7,8))))              |
| 166 | 4,744      | MP        | (18,(17,((16,(14,15)),5,((3,(2,(1,0))),6,(7,8)),(4,13),(9,(12,(10,11))))))          |
|     |            | ML        | (18,(13,(0,3,1,2),4,((17,(16,(14,15))),12,((9,(10,11)),5,(6,(7,8))))))              |
| 167 | 9,449      | MP        | (18,(5,(((1,2),(3,0)),4,((14,(17,(15,16))),13,(6,((7,(8,9)),12,(10,11))))))         |

Table S1: Vibrionaceae 19–taxon large chromosome dataset LCBs and trees (continued).

| LCB | Aligned bp | Algorithm | Tree topologies (Newick)                                                            |
|-----|------------|-----------|-------------------------------------------------------------------------------------|
| 168 | 34,043     | ML        | (18,((4,(13,(0,2,(1,3))))),(17,(16,(14,15))),12,((9,(10,11)),5,(7,(6,8)))));        |
|     |            | MP        | (18,(11,((13,14),(17,((15,(3,(0,(1,2))))),(12,((9,(8,10))),((7,16),(4,(5,6)))))))); |
|     |            | MP        | (18,((16,(14,15)),(17,(13,((5,(4,(0,(1,(2,3))))),(12,(10,11)),(6,(9,(7,8))))))));   |
| 169 | 17,574     | MP        | (18,((17,(16,(14,15))),((9,(7,(8,10))),((11,(12,13)),(6,(5,(4,(0,(3,(1,2))))))));   |
|     |            | ML        | (18,((4,(13,(0,2,(1,3))))),(17,(16,(14,15))),12,((9,(10,11)),5,(7,(6,8)))));        |
|     |            | MP        | (18,((16,17),(14,15),(11,((12,(13,(0,(3,(1,2))))),(8,(9,10))),4,(7,(5,6)))));       |
| 170 | 1,685      | ML        | (18,(17,((16,(14,15)),12,((4,(13,(0,(2,(1,3))))),(9,(10,11)),5,(8,(6,7)))));        |
|     |            | MP        | (18,((16,(14,15)),(17,(13,((5,(4,(0,(3,(1,2))))),(12,(10,11)),9,(7,(6,8))))));      |
| 171 | 15,568     | ML        | (18,(17,((16,(14,15))),((5,8),(6,7)),12,((11,(9,10)),4,(13,(0,3,1,2)))));           |
|     |            | MP        | (18,(14,((17,(15,16)),13,((12,(11,((1,3),(2,0))),((5,7),(6,(4,(8,(9,10))))))));     |
| 172 | 4,279      | ML        | (18,((17,(16,(14,15))),12,((4,(13,(0,(2,3,1))))),(10,(9,11)),8,(5,(6,7)))));        |
|     |            | MP        | (18,(17,((13,(11,12)),14,(15,((4,(5,(6,7))),((8,(9,10)),16,((2,3),(1,0))))));       |
| 173 | 2,574      | ML        | (18,(17,((16,(14,15)),12,((4,13),(8,(7,(5,6))),((11,10,9),(0,1,3,2)))));            |
|     |            | MP        | (18,(4,((0,(2,(1,3))),13,((17,(16,(14,15))),12,((11,(9,10)),8,(5,(6,7))))));        |
| 174 | 30,294     | ML        | (18,(17,(16,(14,15)),12,((4,(13,(0,2,3,1))),10,(9,11)),8,(7,(5,6)))));              |
|     |            | MP        | (18,((17,(16,(14,15))),13,((12,(10,11)),(6,(7,(8,9))),5,(4,(3,(2,(1,0))))));        |
| 175 | 4,739      | ML        | (18,(17,((16,(14,15)),(4,(13,(2,(0,1,3))))),(12,((9,(10,11)),5,(8,(6,7))))));       |
|     |            | MP        | (18,((17,((13,14),(15,16))),12,((7,(5,6)),((11,(9,10)),4,(8,(0,(1,(2,3))))))));     |
| 176 | 8,924      | ML        | (18,(4,(13,(0,2,(1,3))),((12,(17,(16,(14,15))),10,(9,11)),5,(6,(7,8)))));           |
|     |            | MP        | (18,(17,((16,(14,15)),13,((5,(4,(0,(3,(1,2))))),(11,(10,12)),9,(8,(6,7))))));       |
| 177 | 11,027     | ML        | (18,(17,((16,(14,15)),4,((13,(0,1,2,3)),(11,(9,10)),12,(8,(5,(6,7))))));            |
|     |            | MP        | (18,(17,((16,(14,15)),4,((5,(0,(3,(1,2))),13,((12,(10,11)),6,(9,(7,8))))));         |
| 178 | 53,816     | ML        | (18,((4,(13,(0,(2,1,3))),((17,(16,(14,15))),12,((10,(9,11)),6,(5,(7,8))))));        |
|     |            | MP        | (18,((16,(14,15)),17,((0,(2,(1,3))),13,(10,((4,(5,6)),(11,12)),9,(7,8)))));         |
| 179 | 4,791      | ML        | (18,((17,(16,(14,15))),((4,(13,(0,(2,(1,3))))),(12,((9,(10,11)),5,(7,(6,8))))));    |
|     |            | MP        | (18,((17,(15,(13,14))),5,(4,((1,(0,(2,3))),16,((11,(10,12)),9,(6,(7,8))))));        |
| 180 | 11,262     | ML        | (18,(10,(11,(9,((12,(4,(13,(0,2,3,1))),17,(16,(14,15))),5,(6,(7,8))))));            |
|     |            | MP        | (18,(13,((4,(0,(2,(1,3))),12,(17,((16,(14,15)),11,(9,10)),5,(6,(7,8))))));          |
| 181 | 5,463      | ML        | (18,(17,(16,(14,15)),12,((8,(6,(5,7))),10,(9,11)),4,(13,(0,(3,2,1)))));             |
|     |            | MP        | (18,(17,((16,(14,15)),12,((13,(4,(0,(1,(2,3))))),(10,(9,11)),5,(6,(7,8))))));       |
| 182 | 28,543     | ML        | (18,(13,((4,(0,1,3,2)),12,(17,(16,(14,15))),10,(9,11)),6,(8,(5,7)))));              |
|     |            | MP        | (18,(4,((0,(2,(1,3))),16,(14,15)),13,17,12,((9,(10,11)),5,(6,(7,8)))));             |
| 183 | 8,107      | ML        | (18,(17,((16,(14,15)),(4,(13,(0,2,1,3))),12,((11,(9,10)),5,(8,(6,7)))));            |
|     |            | MP        | (18,(13,(17,((8,(9,(6,(5,7))),4,(0,(3,(1,2))),16,(15,(14,(11,(10,12))))));          |
| 184 | 4,562      | ML        | (18,(17,((12,(16,(14,15))),((5,8),(6,7)),11,(9,10)),4,(13,(0,2,1,3)))));            |
|     |            | MP        | (18,(17,(16,(14,15)),10,(9,11)),12,(4,(5,(6,7))),8,13,(0,(3,(1,2)))));              |
| 185 | 39,671     | ML        | (18,((16,(15,(14,17))),9,(5,(8,(6,7))),13,(4,((12,(10,11)),0,(2,(1,3))))));         |
|     |            | MP        | (18,((17,(16,(14,15))),4,(13,(0,(2,1,3))),12,((10,(9,11)),8,(7,(5,6)))));           |

Table S1: Vibrionaceae 19–taxon large chromosome dataset LCBs and trees (continued).

| LCB | Aligned bp | Algorithm | Tree topologies (Newick)                                                              |
|-----|------------|-----------|---------------------------------------------------------------------------------------|
| 186 | 28,901     | MP        | (18,((14,(17,(15,16))),((4,(0,(1,(2,3))))),(13,(8,((6,7),(5,(9,(10,(11,12)))))))));   |
|     |            | ML        | (18,(17,((16,(14,15)),((13,(4,(2,0,(1,3))))),(12,((11,(9,10)),(5,(7,(6,8)))))))));    |
| 187 | 7,952      | MP        | (18,((16,(14,15)),(17,(12,((5,6),(7,8)),((11,(9,10)),(13,(4,((2,3),(1,0)))))))));     |
|     |            | ML        | (18,(17,((16,(14,15)),(12,((4,(13,(0,(2,(1,3))))),(9,(10,11)),(5,(6,(7,8)))))))));    |
| 188 | 20,749     | MP        | (18,(17,((16,(14,15)),(12,((13,(4,(0,(3,(1,2))))),(11,(9,10)),(8,(5,(6,7)))))))));    |
|     |            | ML        | (18,(17,((16,(14,15)),(12,((4,(13,(0,(2,(1,3))))),(10,(9,11)),(5,(7),(6,8)))))))));   |
| 189 | 2,134      | MP        | (18,(16,((5,8),(4,(17,((10,11),(9,(12,(6,7))))),(15,(13,14)),((2,3),(1,0)))))))));    |
|     |            | ML        | (18,((4,(13,(0,(2,(1,3))))),(12,(17,(16,(14,15))))),(10,(9,11)),(5,(8,(6,7)))));      |
| 190 | 23,069     | MP        | (18,(17,((14,(12,13)),((11,(4,(7,(5,6))))),(9,(8,10)),(15,(16,(0,(3,(1,2)))))))));    |
|     |            | ML        | (18,(((4,13),(0,1,2,3)),(17,((16,(14,15)),(12,((11,(9,10)),(5,(7,(6,8)))))))));       |
| 191 | 29,839     | MP        | (18,((14,(17,(15,16))),(11,((1,3),(2,0)),(12,(13,((10,(8,9)),(7,(4,(5,6)))))))));     |
|     |            | ML        | (18,((0,(1,2,3)),(13,(4,((12,(17,(16,(14,15))))),(10,(9,11)),(8,(5,(6,7)))))))));     |
| 192 | 5,354      | MP        | (18,((13,(16,17)),(14,(12,(15,((4,(0,(3,(1,2))))),(8,(6,7)),(5,(11,(9,10)))))))));    |
|     |            | ML        | (18,((17,(16,(14,15))),(12,((4,(13,(0,(3,1,2))))),(10,(9,11)),(5,(8,(6,7)))))))));    |
| 193 | 33,253     | MP        | (18,(16,((17,(15,(13,14))),((0,(3,(1,2))),(4,(5,((10,(11,12)),(6,(9,(7,8)))))))));    |
|     |            | ML        | (18,((17,(12,(16,(14,15))),5,((6,(7,8)),(13,(4,((11,(9,10)),(1,3),(0,2)))))))));      |
| 194 | 5,802      | MP        | (18,((10,(8,9)),(11,(15,((16,(17,(0,(3,(1,2))))),(14,(12,13)),(6,(7,(4,5)))))))));    |
|     |            | ML        | (18,((17,(16,(14,15))),(12,((4,(13,((1,3),(0,2))))),(10,(9,11)),(5,(7,(6,8)))))))));  |
| 195 | 26,196     | MP        | (18,((16,17),(14,15),(13,((5,(4,(0,(2,(1,3))))),(12,(10,11)),(9,(7,(6,8)))))))));     |
|     |            | ML        | (18,(17,((16,(14,15)),(12,((4,(13,(3,1,0,2))))),(10,(9,11)),(5,(8,(6,7)))))))));      |
| 196 | 6,517      | MP        | (18,((4,17),(16,(14,15)),(13,(12,((0,(3,(1,2))),((6,(5,7)),(8,(10,(9,11)))))))));     |
|     |            | ML        | (18,(7,(5,6),(8,((11,(9,10)),(12,(17,(16,(14,15))))),(4,(13,(0,(3,1,2)))))))));       |
| 197 | 9,422      | MP        | (18,(17,((16,(14,15)),((11,(10,12)),(9,(6,(7,8))),(13,(5,(4,(0,(3,(1,2)))))))));      |
|     |            | ML        | (18,((17,(16,(14,15))),((4,(13,(0,(2,3,1))))),(12,((10,(9,11)),(5,(6,(7,8)))))))));   |
| 198 | 5,196      | MP        | (18,(17,((16,(14,15)),(13,((5,(4,(3,(0,(1,2))))),(11,(10,12)),(6,(7,(8,9)))))))));    |
|     |            | ML        | (18,(13,((0,3,1,2),(10,(9,11)),(4,((8,(7,(5,6))),(12,(17,(16,(14,15)))))))));         |
| 199 | 10,917     | MP        | (18,(17,((16,(14,15)),(13,((5,(4,(0,(1,(2,3))))),(12,(10,11)),(9,(6,(7,8)))))))));    |
|     |            | ML        | (18,(17,(12,(16,(14,15))),((4,(13,(1,2,0,3))),((9,(10,11)),(5,(6),(7,8)))));          |
| 200 | 9,889      | MP        | (18,((17,(16,(14,15))),((12,(0,(1,(2,3))))),(9,10),(11,(4,(13,(5,(6,(7,8)))))))));    |
|     |            | ML        | (18,(17,((16,(14,15)),(4,(13,(1,0,3,2))),(12,((9,(10,11)),(5,(8,(6,7)))))))));        |
| 201 | 23,891     | MP        | (18,((16,17),(15,(14,(5,(4,(0,(3,(1,2))))),(13,((12,(10,11)),(9,(6,(7,8)))))))));     |
|     |            | ML        | (18,(17,((16,(14,15)),(12,(5,((7,(6,8))),((9,(10,11)),(4,(13,(0,(2,(1,3))))))))))))); |
| 202 | 848        | MP        | (18,(17,((16,(14,15)),(13,((5,(4,(0,(1,(2,3))))),(10,(11,12)),(6,(9,(7,8)))))))));    |
|     |            | ML        | (18,(17,((16,(14,15)),(12,((4,(13,(0,(2,3,1))))),(11,(9,10)),(5,(6,(7,8)))))))));     |
| 203 | 8,067      | MP        | (18,(17,((16,(14,15)),(12,((13,(4,(3,(0,(1,2))))),(9,(10,11)),(5,(8,(6,7)))))))));    |
|     |            | ML        | (18,(17,((16,(14,15)),(12,((4,(13,(0,(2,(1,3))))),(10,9,11),(6,(5,(7,8)))))))));      |
| 204 | 4,838      | MP        | (18,(17,((16,(14,15)),((11,(10,12)),(9,(8,(6,7))),(13,(5,(4,(0,(1,(2,3)))))))));      |
|     |            | ML        | (18,(((1,3),(0,2)),(13,(4,((10,(9,11)),(8,(6,7)),(5,(12,(17,(16,(14,15)))))))))))));  |

Table S1: Vibrionaceae 19–taxon large chromosome dataset LCBs and trees (continued).

| LCB | Aligned bp | Algorithm | Tree topologies (Newick)                                                              |
|-----|------------|-----------|---------------------------------------------------------------------------------------|
| 205 | 9,436      | ML        | (18,(17,((16,(14,15)),(12,((4,(13,(3,1,(0,2))))),((11,(9,10)),((7,8),(5,6))))))));    |
|     |            | MP        | (18,(17,((16,(14,15)),(5,(4,((2,3),(1,0))))),((13,((12,(10,11)),(6,(9,(7,8))))))));   |
|     |            | MP        | (18,((14,(17,(15,16))),((13,((11,(12,(0,(3,(1,2))))),((8,(9,10)),((4,7),(5,6)))))))); |
| 206 | 11,145     | ML        | (18,((17,(16,(14,15))),((12,((4,(13,(0,(2,(1,3))))),((10,(9,11)),(5,(8,(6,7))))))));  |
|     |            | MP        | (18,((13,((12,(10,11)),(4,(7,(5,6))))),((17,((16,(14,15)),(8,(9,(0,(3,(1,2))))))));   |
|     |            | ML        | (18,((17,(16,(14,15))),((4,(13,(0,(3,1,2))))),((12,((11,(9,10)),(8,(7,(5,6))))))));   |
| 207 | 15,746     | MP        | (18,((15,(16,17)),(11,(12,(13,14))),((4,7),((10,(8,9)),(6,(5,(0,(1,(2,3))))))));      |
|     |            | ML        | (18,((17,(16,(14,15))),((4,(13,(0,(2,1,3))))),((12,((11,(9,10)),(5,(7,(6,8))))))));   |
| 208 | 7,339      | MP        | (18,(17,((16,(14,15)),(5,(4,(0,(3,(1,2))))),((13,((12,(10,11)),(9,(6,(7,8))))))));    |
|     |            | ML        | (18,(17,((16,(14,15)),(4,(13,(0,(1,2,3))))),((12,((11,(9,10)),(5,(7,(6,8))))))));     |
| 209 | 22,240     | MP        | (18,(17,((16,(14,15)),(5,(4,(0,(3,(1,2))))),((13,((12,(10,11)),(9,(8,(6,7))))))));    |
|     |            | ML        | (18,(17,((16,(14,15)),(4,(13,(0,(3,1,2))))),((12,((10,(9,11)),(5,(7,(6,8))))))));     |
| 210 | 17,557     | MP        | (18,((17,(16,(14,15))),((9,(5,(7,(6,8))))),((13,(11,12)),(10,(4,((1,3),(2,0))))))));  |
|     |            | ML        | (18,((17,(16,(14,15))),((4,(13,(0,(2,(1,3))))),((12,((11,(9,10)),(5,(7,(6,8))))))));  |
| 211 | 6,211      | MP        | (18,((17,(16,(14,15))),((13,(9,(8,(6,7))))),((5,(4,((12,(10,11)),(0,(3,(1,2))))))));  |
|     |            | MP        | (18,((16,(14,15)),(17,((5,(4,(0,(2,(1,3))))),((13,((12,(10,11)),(9,(6,(7,8))))))));   |
|     |            | ML        | (18,(17,((16,(14,15)),(4,(13,(0,(3,1,2))))),((12,((10,(9,11)),(5,(8,(6,7))))))));     |
| 212 | 847        | MP        | (18,(17,((13,14)),((4,(15,16))),((12,(0,(2,(1,3))))),((9,(10,11)),((5,6),(7,8))))));  |
|     |            | ML        | (18,((17,(16,(14,15))),((11,(9,10)),(12,(5,(7,(6,8))))),((4,(13,(3,1,0,2))))));       |
| 213 | 2,377      | MP        | (18,((17,(16,(14,15))),((13,((5,(4,(0,(3,(1,2))))),((10,(11,12)),(6,(8,(7,9))))))));  |
|     |            | ML        | (18,(17,((16,(14,15)),(12,((5,(6,(7,8))))),((10,(9,11)),(4,(13,(3,0,2,1))))))));      |
| 214 | 3,380      | MP        | (18,(11,((12,(0,(1,(2,3))))),((13,((17,(16,(14,15))),((8,(9,10)),(7,(4,(5,6))))))));  |
|     |            | ML        | (18,(17,((16,(14,15)),(4,((13,(3,0,2,1))),((12,((11,(9,10)),(5,(7,(6,8))))))));       |
| 215 | 11,992     | MP        | (18,((16,17),((6,(5,(4,(0,(2,(1,3))))),((15,(14,((12,(10,11)),(13,(9,(7,8))))))));    |
|     |            | ML        | (18,((13,(2,3,0,1)),((4,(12,(17,(16,(14,15))))),((11,(9,10)),(7,(8,(5,6))))))));      |
| 216 | 11,235     | MP        | (18,(6,((8,(7,(5,(17,(12,(10,11))))),((9,(4,((16,(14,15)),(13,((2,3),(1,0))))))));    |
|     |            | ML        | (18,((17,(16,(14,15))),((11,(9,10)),(5,(6,(7,8))),((12,(4,(13,(0,(1,3,2))))))));      |
| 217 | 4,205      | MP        | (18,(16,(11,((4,(5,6)),(10,(8,9))),((7,(13,(17,(14,15))),((12,((2,3),(1,0))))))));    |
|     |            | ML        | (18,((13,(0,(3,1,2))),((4,((12,((16,17),(14,15))),((10,(9,11)),(8,(7,(5,6))))))));    |
| 218 | 8,844      | MP        | (18,((17,(15,16)),(14,(13,((5,(4,((1,3),(2,0))))),((10,(11,12)),(6,(9,(7,8))))))));   |
|     |            | ML        | (18,((17,(16,(14,15))),((12,((4,(13,(0,(3,2,1))))),((10,(9,11)),(5,(8,(6,7))))))));   |
| 219 | 18,577     | MP        | (18,(17,((4,(16,(14,15))),((1,3),(2,0))),((12,((11,(9,10)),(13,(5,(8,(6,7))))))));    |
|     |            | ML        | (18,((17,(16,(14,15))),((9,(10,11)),(5,(7,(6,8))),((12,(4,(13,(0,(2,(1,3))))))));     |
| 220 | 1,632      | MP        | (18,(9,(13,((17,(16,(14,15))),((4,((2,3),(1,0))),((11,(10,12)),(8,(7,(5,6))))))));    |
|     |            | MP        | (18,(12,((4,(11,(9,10))),((5,(6),(7,8))),((14,(17,(15,16))),(13,(0,(1,(2,3))))))));   |
|     |            | ML        | (18,(13,(0,(2,1,3)),(4,((12,(17,(16,(14,15))),((9,(10,11)),(6,(8),(5,7))))))));       |
| 221 | 4,526      | MP        | (18,((2,(3,(1,0))),((11,(12,((16,(17,(15,(13,14))))),((8,(9,10)),((4,5),(6,7)))))))); |
|     |            | ML        | (18,((9,(10,11)),(5,(8,(6,7))),((12,((4,(17,(16,(14,15))),(13,(0,(1,2,3))))))));      |
| 222 | 17,101     | MP        | (18,((17,(16,(14,15))),((13,((5,(4,(0,(3,(1,2))))),((12,(10,11)),(6,(8,(7,9))))))));  |

Table S1: Vibrionaceae 19–taxon large chromosome dataset LCBs and trees (continued).

| LCB | Aligned bp | Algorithm | Tree topologies (Newick)                                                       |
|-----|------------|-----------|--------------------------------------------------------------------------------|
| 223 | 6,326      | ML        | (18,((4,(13,(0,(3,2,1))))),(12,(17,(16,(14,15)))),(9,(10,11)),(5,(8,(6,7))))); |
|     |            | MP        | (18,((16,17),(14,15),(13,(12,(0,(2,(1,3))))),(4,7),(5,6),(11,(10,(8,9)))));    |
| 224 | 9,367      | ML        | (18,(17,(16,(14,15)),(12,(4,(13,(0,(2,(1,3))))),(11,(9,10)),(5,(6,(7,8)))));   |
|     |            | MP        | (18,(17,(16,(14,15)),(5,(4,(2,(3,(1,0))))),(13,(10,(9,11)),(8,(12,(6,7)))));   |
| 225 | 9,840      | ML        | (18,(17,(12,(16,(14,15))),4,(13,(0,(1,3,2))),((10,(9,11)),(5,(6,(7,8)))));     |
|     |            | MP        | (18,(17,(16,(14,15)),(5,(4,(3,(0,(1,2))))),(13,(9,(6,(7,8)),(12,(10,11)))));   |
| 226 | 16,444     | ML        | (18,((9,(10,11)),(12,(17,(16,(14,15)))),(5,(6,(7,8))),4,(13,(0,(3,2,1)))));    |
|     |            | MP        | (18,(13,(12,((10,(8,9)),(7,(6,(4,5))))),(1,(2,(3,0))),11,(17,(16,(14,15)))));  |
| 227 | 9,920      | ML        | (18,(17,(16,(14,15)),(12,(4,(13,(0,(2,3,1))))),(9,(10,11)),(5,(7,(6,8)))));    |
|     |            | MP        | (18,(14,(17,(15,16)),(5,(4,(0,(2,(1,3))))),(13,(12,(10,11)),(9,(8,(6,7)))));   |
| 228 | 1,2471     | ML        | (18,(17,(16,(14,15)),((9,(10,11)),(8,(5,(6,7))),12,(4,(13,(0,(3,2,1)))));      |
|     |            | MP        | (18,(17,(16,(14,15)),(5,(4,(3,(0,(1,2))))),(13,(10,(11,12)),(9,(6,(7,8)))));   |
| 229 | 1,7751     | ML        | (18,((17,(16,(14,15))),12,(5,(7,(6,8))),10,(9,11)),4,(13,(0,(1,2,3)))));       |
|     |            | MP        | (18,((17,(16,(14,15))),((11,(9,10)),(7,(6,(4,5))),8,(13,(12,(1,(3,(2,0))))));  |
| 230 | 7,613      | MP        | (18,(7,((11,(9,10)),(17,(14,(12,13))),8,(4,(5,6))),15,(16,(1,(3,(2,0)))));     |
|     |            | ML        | (18,(4,(2,(0,(1,3))),13,(10,(9,11)),(5,(6,(7,8))),12,(17,(16,(14,15)))));      |
|     |            | MP        | (18,((17,(16,(14,15))),13,(12,(4,(3,(0,(1,2))))),(9,(10,11)),(5,(8,(6,7)))));  |
| 231 | 22,638     | ML        | (18,(17,(16,(14,15)),((10,(9,11)),(5,(8,(6,7))),12,(4,(13,(2,(0,(1,3))))));    |
|     |            | MP        | (18,((16,(14,15)),17,(4,(13,(2,(3,(1,0))))),(7,(5,6)),12,(8,(11,(9,10)))));    |
| 232 | 9,763      | ML        | (18,((17,(16,(14,15))),12,(4,(13,(0,(2,(1,3))))),(9,(10,11)),(5,(7,(6,8)))));  |
|     |            | MP        | (18,((17,(15,16)),14,(5,(4,(2,3),(1,0))),6,(7,(8,9)),10,(13,(11,12)))));       |
| 233 | 3,923      | ML        | (18,(17,(16,(14,15)),12,(4,(13,(0,(1,2,3))))),(9,(10,11)),(5,(6,(7,8)))));     |
|     |            | MP        | (18,(17,(16,(14,15)),(12,(4,(1,(3,(2,0))))),(13,(11,(9,10)),(5,(8,(6,7)))));   |
|     |            | ML        | (18,(17,(16,(14,15)),12,(13,(4,(1,3),(2,0))),11,(9,10)),(5,(6,(7,8)))));       |
| 234 | 14,445     | MP        | (18,((17,(16,(14,15))),4,(13,(0,2,3,1))),12,(9,(10,11)),(5,(8,(6,7)))));       |
|     |            | ML        | (18,(17,(16,(14,15)),13,(11,(12,(2,3),(1,0))),8,(9,10)),4,(6,(5,7)))));        |
| 235 | 6,589      | ML        | (18,((12,(17,(16,(14,15))),4,(13,(0,(3,1,2))),9,(10,11)),(5,(8,(6,7)))));      |
|     |            | MP        | (18,(17,(12,(4,(2,3),(1,0))),13,(5,6),(16,(14,15)),(7,8),(11,(9,10)))));       |
| 236 | 4,760      | ML        | (18,((5,(8,(6,7))),10,(9,11)),12,(17,(16,(14,15))),4,(13,(1,0,2,3)))));        |
|     |            | MP        | (18,(17,(12,(13,14)),6,(15,16),(3,(1,(2,0))),4,(5,7)),9,(10,(8,11)))));        |
| 237 | 4,378      | ML        | (18,((17,(16,(14,15))),10,(9,11)),12,(5,(8,(6,7))),4,(13,(3,2,0,1)))));        |
|     |            | MP        | (18,(16,(15,(13,14)),(4,(0,(3,(1,2))),11,(12,(9,(8,10))),5,(17,(6,7)))));      |
| 238 | 5,168      | ML        | (18,(17,(16,(14,15)),12,(5,(6,(7,8))),9,(10,11)),4,(13,(2,0,(1,3)))));         |
|     |            | MP        | (18,((17,(16,(14,15))),5,(4,(13,(2,(3,(1,0))))),(10,(11,12)),(9,(6,(7,8)))));  |
| 239 | 4,004      | ML        | (18,((17,(16,(14,15))),12,(4,(13,(0,2,1,3))),9,(10,11)),(5,(6,(7,8)))));       |
|     |            | MP        | (18,((17,(16,(14,15))),13,(5,(4,(0,(3,(1,2))))),(12,(10,11)),9,(8,(6,7)))));   |
| 240 | 6,971      | ML        | (18,(12,(4,(13,(0,1,2,3))),17,(16,(14,15)),10,(9,11)),(5,(8,(6,7)))));         |
|     |            | MP        | (18,((17,(16,(14,15))),4,(2,(3,(1,0))),13,(12,(11,(9,10))),8,(7,(5,6)))));     |
|     |            | ML        | (18,(17,(16,(14,15)),(5,(7,(6,8))),12,(11,(9,10)),4,(13,(0,2,(1,3)))));        |

Table S1: Vibrionaceae 19–taxon large chromosome dataset LCBs and trees (continued).

| LCB | Aligned bp | Algorithm | Tree topologies (Newick)                                                             |
|-----|------------|-----------|--------------------------------------------------------------------------------------|
| 241 | 10,790     | MP        | (18,((16,(14,15)),((13,(11,((1,2),(3,0))))),(6,7),(5,(4,((12,17),(10,(8,9))))))));   |
|     |            | ML        | (18,(17,((16,(14,15)),(12,((5,(6,(7,8))),((10,(9,11)),(4,(13,(2,0,1,3))))))));       |
| 242 | 3,407      | MP        | (18,((16,17),(8,((9,(10,11)),(4,(7,(5,6))))),(12,(14,15)),(13,(0,(3,(1,2))))));      |
|     |            | ML        | (18,(13,((0,2,1,3),(4,((8,(5,(6,7))),((9,(10,11)),((12,17),(16,(14,15))))))));       |
| 243 | 7,533      | MP        | (18,(17,((16,(14,15)),((5,(4,(0,(3,(1,2))))),(13,(11,12)),(10,(6,(7,(8,9))))))));    |
|     |            | MP        | (18,((5,((1,2),(3,0))),((12,(10,11)),((9,(6,(7,8))),(17,(15,(16,(4,(13,14))))))));   |
|     |            | ML        | (18,((17,(16,(14,15))),((0,(1,2,3)),((10,(9,11)),((4,13),(12,(5,(7,(6,8))))))));     |
| 244 | 5,858      | MP        | (18,((16,17),(13,14),(11,(9,10)),(6,(5,(7,8))),((4,(12,15)),(0,(1,(2,3))))));        |
|     |            | ML        | (18,((7,(8,(5,6))),((0,(2,1,3)),((13,(4,12)),((10,(9,11)),(17,(16,(14,15))))))));    |
| 245 | 11,791     | MP        | (18,((16,(14,15)),(13,((10,(11,12)),(9,(8,(6,7))),(5,((4,17),(1,(0,(2,3))))))));     |
|     |            | ML        | (18,(17,((16,(14,15)),(12,((4,(13,(3,2,0,1))),((9,(10,11)),(6,(5,(7,8))))))));       |
| 246 | 2,714      | MP        | (18,(17,((5,((1,2),(3,0))),(13,((6,(10,(8,9))),((7,(11,12)),(4,(16,(14,15))))))));   |
|     |            | ML        | (18,(17,((16,(14,15)),(12,((4,(5,(8,(6,7))),((11,(9,10)),(13,(0,(3,1,2))))))));      |
| 247 | 5,800      | MP        | (18,((17,(15,16)),(14,((13,(12,(1,(3,(2,0))))),(8,((10,(9,11)),(4,(5,(6,7))))))));   |
|     |            | ML        | (18,((17,(16,(14,15))),((5,(7,(6,8))),((11,(9,10)),(12,(4,(13,(0,(3,2,1))))))));     |
| 248 | 1,203      | MP        | (18,((4,(7,(5,6))),(8,((12,(10,11)),((0,(2,(1,3))),((13,(9,14),(17,(15,16))))))));   |
|     |            | ML        | (18,((5,(17,(16,(14,15))),((12,((6,(7,8))),(13,(4,((10,(9,11)),(0,1,2,3))))))));     |
| 249 | 8,583      | MP        | (18,(17,((12,(11,13)),(4,(6,(5,7))),(9,((0,(1,(2,3))),((10,(8,(16,(14,15))))))));    |
|     |            | ML        | (18,((17,(16,(14,15))),((12,(8,(6,(5,7))),(4,((10,(9,11)),(13,(0,1,3,2))))))));      |
| 250 | 1,447      | MP        | (18,((9,(7,(5,6))),((4,(0,(1,(2,3))),((13,((10,(11,12)),(8,(17,(16,(14,15))))))));   |
|     |            | ML        | (18,((17,(16,(14,15))),((13,(0,3,1,2)),((4,12),((10,(9,11)),(8,(6,(5,7))))))));      |
| 251 | 23,433     | MP        | (18,(12,((10,(8,9)),((13,(17,(16,(14,15))),((7,(4,(5,6))),(11,(0,(3,(1,2))))))));    |
|     |            | ML        | (18,((17,(16,(14,15))),((4,(13,(0,1,3,2))),((12,((9,(10,11)),(5,(6,(7,8))))))));     |
| 252 | 13,753     | MP        | (18,((0,(3,(1,2))),((12,((13,(11,(9,10))),((5,(7,(4,6))),(8,(17,(16,(14,15))))))));  |
|     |            | ML        | (18,((17,(16,(14,15))),((4,(13,(0,2,(1,3))),((12,((10,(9,11)),(5,(8,(6,7))))))));    |
| 253 | 28,468     | MP        | (18,((17,(15,(13,14))),((12,((8,(1,(0,(2,3))),((7,(16,((4,(5,6))),(11,(9,10)))))))); |
|     |            | ML        | (18,((4,(13,(1,0,2,3))),((10,(9,11)),((5,(6,(7,8))),(12,(17,(16,(14,15))))))));      |
| 254 | 8,722      | MP        | (18,((17,(16,(14,15))),((13,((12,(4,(0,(3,(1,2))))),(11,(9,10)),(8,(7,(5,6))))))));  |
|     |            | ML        | (18,((0,1,2,3),(13,(4,((9,(10,11)),((7,(8,(5,6))),(12,(17,(16,(14,15))))))));        |
| 255 | 19,319     | MP        | (18,((17,(16,(14,15))),((13,((12,(4,(0,(1,(2,3))))),(11,(9,10)),(5,(8,(6,7))))))));  |
|     |            | ML        | (18,((17,(16,(14,15))),((12,((13,(4,(0,3,2,1))),((9,(10,11)),(8,(6,(5,7))))))));     |
| 256 | 4,293      | MP        | (18,((16,(14,15)),(17,((4,(13,(0,(2,(1,3))))),(12,((9,(10,11)),(5,(8,(6,7))))))));   |
|     |            | ML        | (18,((17,(16,(14,15))),((4,(13,(1,2,0,3))),((12,((9,(10,11)),(5,(8,(6,7))))))));     |
| 257 | 13,007     | MP        | (18,((16,(14,15)),(13,((4,17),(0,(3,(1,2))),((12,((11,(9,10)),(5,(8,(6,7))))))));    |
|     |            | ML        | (18,((17,(16,(14,15))),((4,(13,(0,1,2,3))),((12,((10,(9,11)),(5,(8,(6,7))))))));     |
| 258 | 9,871      | MP        | (18,((14,(17,(15,16))),((12,13),((4,(7,(5,6))),((10,(9,11)),(8,(3,(2,(1,0))))))));   |
|     |            | ML        | (18,(17,((16,(14,15)),((4,(13,(0,1,2,3))),((12,((9,(10,11)),(5,(8,(6,7))))))));      |
| 259 | 3,647      | MP        | (18,((17,(0,(1,(2,3))),((13,(8,((12,(16,(14,15))),((11,(9,10)),(7,(5,(4,6))))))));   |
|     |            | MP        | (18,(17,((16,(14,15)),((13,(4,(0,(2,(1,3))))),(12,((11,(9,10)),(5,(6,(7,8))))))));   |

Table S1: Vibrionaceae 19–taxon large chromosome dataset LCBs and trees (continued).

| LCB | Aligned bp | Algorithm | Tree topologies (Newick)                                                           |
|-----|------------|-----------|------------------------------------------------------------------------------------|
| 260 | 9,626      | ML        | (18,(17,((16,(14,15)),((13,(0,(1,2,3))),4,(12,((10,(9,11)),(5,(8,(6,7)))))))));    |
|     |            | MP        | (18,(17,((16,(14,15)),(12,((13,(4,((1,3),(2,0))),((9,(10,11)),(8,(7,(5,6))))))))); |
| 261 | 6,554      | ML        | (18,(17,((16,(14,15)),((9,(10,11)),(5,(7,(6,8))),12,(4,(13,(0,(3,1,2)))))))));     |
|     |            | MP        | (18,((16,17),((1,2),(3,0)),((7,(5,6)),9,((12,(10,11)),13,((4,8),(14,15))))))));    |
| 262 | 1,829      | ML        | (18,(11,(10,9,((2,1,0,3)),((4,13),(12,((5,(8,(6,7))),17,(16,(14,15)))))))));       |
|     |            | MP        | (18,(13,((14,(17,(15,16))),12,((4,(0,(1,(2,3))),5,((8,(6,7)),11,(9,10))))))));     |
| 263 | 22,464     | ML        | (18,(12,((4,(13,(3,0,1,2))),17,(16,(14,15))),10,(9,11)),5,(7,(6,8))))));           |
|     |            | MP        | (18,((17,(13,14)),16,((9,15),(8,(6,7))),10,(11,12)),4,(5,((1,3),(2,0))))));        |
| 264 | 14,861     | ML        | (18,((17,(16,(14,15))),((4,(13,(0,(2,(1,3))))),12,((10,(9,11)),8,(6,(5,7))))));    |
|     |            | MP        | (18,((3,(0,(1,2))),((7,(5,6)),13,(4,((17,(16,(14,15))),8,12),(11,(9,10))))));      |
| 265 | 13,293     | ML        | (18,((13,(3,0,2,1)),((4,(10,(9,11))),5,(8,(6,7))),12,(17,(16,(14,15))))));         |
|     |            | MP        | (18,(13,((0,(3,(1,2))),11,((12,(17,(16,(14,15))),8,(9,10)),7,(4,(5,6))))));        |
| 266 | 2,467      | ML        | (18,(17,((16,(14,15)),12,((5,8),(6,7)),4,(10,(9,11))),13,(1,3,0,2))))));           |
|     |            | MP        | (18,((16,17),((9,(11,(10,12))),6,(5,7)),8,14),4,((2,3),(13,15),(1,0))))));         |
| 267 | 2,260      | ML        | (18,(17,((16,(14,15)),((4,(13,(0,2,1,3))),12,((10,(9,11)),8,(7,(5,6))))));         |
|     |            | MP        | (18,((16,(14,15)),17,(13,((5,(4,((2,3),(1,0))),11,(10,12)),9,(7,(6,8))))));        |
| 268 | 4,118      | ML        | (18,(17,((16,(14,15)),((4,(13,(0,(3,2,1))),10,(9,11)),12,(5,(8,(6,7))))));         |
|     |            | MP        | (18,((11,(10,(8,9))),13,((12,(0,(3,(1,2))),16,(14,15)),7,(17,(4,(5,6))))));        |
| 269 | 13,105     | ML        | (18,(17,((16,(14,15)),((11,(9,10)),5,(8,(6,7))),12,(13,(4,(0,1,3,2))))));          |
|     |            | MP        | (18,((17,(16,(14,15))),13,((5,(4,(1,(2,(3,0))),12,(10,11)),6,(9,(7,8))))));        |
| 270 | 20,985     | ML        | (18,(17,((16,(14,15)),((4,(2,(0,(1,3))),13,(9,(10,11)),12,((5,6),(7,8))))));       |
|     |            | MP        | (18,(17,((16,(14,15)),5,(4,(2,(3,(1,0))),13,((12,(10,11)),9,(6,(7,8))))));         |
| 271 | 10,436     | ML        | (18,((17,(16,(14,15))),12,((4,(13,(2,(0,(1,3))),10,(9,11)),5,(8,(6,7))))));        |
|     |            | MP        | (18,((14,(12,13)),16,((15,(4,(0,(3,(1,2))),17,((11,(9,10)),5,(8,(6,7))))));        |
| 272 | 3,882      | ML        | (18,((17,(16,(14,15))),12,((4,(13,(1,3),(0,2))),11,(9,10)),8,(5,(6,7))))));        |
|     |            | MP        | (18,((14,(12,13)),16,((15,(4,(0,(3,(1,2))),17,((11,(9,10)),5,(8,(6,7))))));        |
|     |            | MP        | (18,(17,((16,(14,15)),5,(4,(0,(2,(1,3))),13,((10,(11,12)),9,(6,(7,8))))));         |
|     |            | MP        | (18,(13,((5,(4,(0,(2,(1,3))),17,(16,(14,15))),12,(10,11)),9,(7,(6,8))))));         |
|     |            | ML        | (18,(15,(14,(16,(17,(12,((4,(13,(1,3),(0,2))),9,(10,11)),5,(8,(6,7)))))))));       |
| 273 | 6,231      | MP        | (18,((12,(0,(3,(1,2))),17,(13,(16,(14,15))),4,((11,(9,10)),5,(6,(7,8))))));        |
|     |            | ML        | (18,((13,(2,0,1,3)),4,((12,(17,(16,(14,15))),10,(9,11)),5,(6,(7,8))))));           |
| 274 | 11,251     | MP        | (18,((5,(4,(0,(2,(1,3))),9,(6,(7,8))),13,((10,(11,12)),17,(16,(14,15))))));        |
|     |            | ML        | (18,((12,(16,(14,15))),17,((4,(13,(1,0,2,3))),9,(10,11)),7,(8,(5,6))))));          |
| 275 | 7,695      | MP        | (18,((17,(16,(14,15))),4,(5,(0,(1,(2,3))),13,((10,(11,12)),9,(7,(6,8))))));        |
|     |            | MP        | (18,((17,(16,(14,15))),5,(4,((2,3),(1,0))),13,((12,(10,11)),6,(9,(7,8))))));       |
|     |            | ML        | (18,(17,((12,(16,(14,15))),4,(13,(0,3,2,1))),10,(9,11)),8,(5,(6,7))))));           |
| 276 | 29,440     | MP        | (18,((17,(16,(14,15))),13,((12,(4,((1,3),(2,0))),10,(9,11)),5,(8,(6,7))))));       |
|     |            | ML        | (18,(17,((16,(14,15)),12,((4,(13,(0,(3,1,2))),10,(9,11)),5,(6,(7,8))))));          |
| 277 | 963        | MP        | (18,((13,(14,(15,(16,17))),((1,2),(3,0)),5,11),7,((12,(4,6)),8,(9,10))))));        |

Table S1: Vibrionaceae 19–taxon large chromosome dataset LCBs and trees (continued).

| LCB | Aligned bp | Algorithm | Tree topologies (Newick)                                                               |
|-----|------------|-----------|----------------------------------------------------------------------------------------|
| 278 | 16,240     | ML        | (18,(17,((16,(14,15)),((4,(13,(0,3,1,2))),((5,(8,(6,7))),((12,(11,(9,10)))))))));      |
|     |            | MP        | (18,((9,(8,10)),((4,11),(7,(5,6))),((17,(16,(14,15))),((12,13),(0,(3,(1,2)))))))));    |
|     |            | MP        | (18,((14,(17,(15,16))),((4,(1,(2,(3,0))))),((11,(9,10)),(5,((12,13),(8,(6,7)))))))));  |
| 279 | 9,934      | ML        | (18,(17,((16,(14,15)),(12,((4,(13,((1,3),(0,2))),((10,(9,11)),(5,(7,(6,8)))))))));     |
|     |            | MP        | (18,((4,(8,(12,(14,(15,16))))),((2,(3,(1,0))),(17,(13,((5,(6,7)),(11,(9,10)))))))));   |
|     |            | ML        | (18,((17,(16,(14,15))),((4,(13,(0,(1,2,3))))),((10,(9,11)),(12,((5,6),(7,8))))));      |
| 280 | 25,764     | MP        | (18,((17,(16,(14,15))),((13,(4,((1,2),(3,0))))),((12,(11,(9,10)),(5,(7,(6,8)))))))));  |
|     |            | ML        | (18,((12,(17,(16,(14,15))))),((13,(4,(0,(2,(1,3))))),((10,(9,11)),(8,(5,(6,7))))));    |
| 281 | 6,358      | MP        | (18,((17,(16,(14,15))),((5,(4,(1,(0,(2,3))))),((13,(12,(10,11)),(9,(8,(6,7)))))))));   |
|     |            | ML        | (18,((16,(14,15)),(17,(12,((8,(5,(6,7))),((11,(9,10)),(4,(13,(2,(0,(1,3))))))))));     |
| 282 | 7,806      | MP        | (18,((5,(4,(0,(3,(1,2))))),((17,(16,(14,15))),((13,((10,(11,12)),(6,(9,(7,8)))))))));  |
|     |            | ML        | (18,((17,(16,(14,15))),(12,((5,6),(7,8))),((10,(9,11)),(4,(13,(2,(0,1,3))))));         |
| 283 | 5,314      | MP        | (18,((17,(16,(14,15))),((5,(4,(3,(0,(1,2))))),((12,(10,11)),(13,(6,(7,(8,9)))))))));   |
|     |            | MP        | (18,((17,(16,(14,15))),((5,(4,(0,(1,(2,3))))),((13,(12,(10,11)),(9,(8,(6,7)))))))));   |
|     |            | MP        | (18,((13,(17,(16,(14,15))))),((5,(4,(3,(1,(2,0))))),((11,(10,12)),(6,(8,(7,9))))));    |
| 284 | 5,126      | ML        | (18,((16,(14,15)),(17,(4,((13,(2,(0,(1,3))))),((10,(9,11)),(12,(5,(8,(6,7)))))))));    |
|     |            | MP        | (18,(17,((16,(15,(13,14))),((12,(8,((1,2),(3,0))))),((9,(10,11)),(4,(5,(6,7)))))))));  |
|     |            | ML        | (18,(17,((16,(14,15)),(12,((13,(4,(0,(2,(1,3))))),((11,(9,10)),(5,(8,(6,7)))))))));    |
| 285 | 1,3804     | MP        | (18,((17,(16,(14,15))),((12,(10,11)),(6,(7,(8,9))),((13,(5,(4,((1,3),(2,0)))))))));    |
|     |            | ML        | (18,((16,(14,15)),(17,(12,((4,(13,(0,(2,3,1))))),((10,(9,11)),(8,(7,(5,6)))))))));     |
| 286 | 30,507     | MP        | (18,(5,((4,(0,(1,(2,3))))),((13,(14,(17,(15,16))))),((12,(10,11)),(6,(7,(8,9))))));    |
|     |            | ML        | (18,((4,(13,(0,(3,2,1))))),((12,(17,(16,(14,15))))),((9,(10,11)),(8,(5,(6,7))))));     |
| 287 | 5,736      | MP        | (18,((9,(7,((6,8),(13,(10,(11,12))))),((17,(16,(14,15))),(5,(4,(0,(1,(2,3)))))))));    |
|     |            | ML        | (18,((17,(16,(14,15))),(12,((8,(7,(5,6))),((11,(9,10)),(4,(13,((1,3),(0,2)))))))));    |
| 288 | 2,046      | MP        | (18,((17,(16,(14,15))),((5,(4,(0,(3,(1,2))))),((13,(12,(10,11)),(6,(8,(7,9)))))))));   |
|     |            | ML        | (18,(3,1,((0,2),(13,(4,((9,(10,11)),((5,(7,(6,8))),((17,(12,(16,(14,15))))))))));      |
| 289 | 1,152      | MP        | (18,((17,(16,(14,15))),((10,(13,(11,12))),((4,(7,(5,6))),(8,(9,((1,3),(2,0)))))))));   |
|     |            | MP        | (18,(5,((6,((13,(11,12)),(7,(10,(8,9))))),((17,((4,(16,(14,15))),((0,(1,(2,3))))))))); |
|     |            | MP        | (18,(17,((6,(4,(11,((1,3),(2,0))))),((16,(14,15)),((5,(7,13)),(12,(10,(8,9)))))))));   |
|     |            | ML        | (18,((17,(16,(14,15))),(12,((4,(13,((1,3),(0,2))))),((11,(9,10)),(5,(7,(6,8)))))))));  |
| 290 | 10,570     | MP        | (18,(17,((16,(14,15)),((9,(4,((2,3),(1,0))))),((8,(5,(6,7))),((13,(11,(10,12))))))))); |
|     |            | ML        | (18,(17,((16,(14,15)),(12,((4,(13,((1,3),(0,2))))),((11,(9,10)),(5,(7,(6,8)))))))));   |
| 291 | 5,713      | MP        | (18,((16,(14,15))),((10,(11,12)),(9,(7,(6,8))),((13,17),(5,(4,((2,3),(1,0)))))))));    |
|     |            | ML        | (18,((17,(16,(14,15))),(12,((4,(13,(2,0,1,3))),((10,(9,11)),(5,(6,(7,8)))))))));       |
| 292 | 7,861      | MP        | (18,((8,(6,7)),(13,(12,(10,11))),((9,(14,(17,(15,16))))),((5,(4,(0,(1,(2,3)))))))));   |
|     |            | ML        | (18,((12,(17,(16,(14,15))))),((4,(13,(0,1,2,3))),((9,(10,11)),(7,(8),(5,6)))));        |
| 293 | 30,825     | MP        | (18,(11,((4,(5,(6,7))),((17,(10,(8,9))),((0,(2,(1,3))),((12,13),(16,(14,15)))))))));   |
|     |            | ML        | (18,((17,(16,(14,15))),((4,(13,(0,(2,(1,3))))),((12,(9,(10,11)),(5,(7,(6,8)))))))));   |
| 294 | 8,398      | MP        | (18,(17,((4,(7,8)),(12,(10,11))),((6,(3,(2,(1,0))),((9,(5,13),(16,(14,15)))))))));     |



Table S1: Vibrionaceae 19-taxon large chromosome dataset LCBs and trees (continued).

| LCB | Aligned bp | Algorithm | Tree topologies (Newick)                                                             |
|-----|------------|-----------|--------------------------------------------------------------------------------------|
| 295 | 3,013      | ML        | (18,(17,((16,(14,15)),(12,((4,(13,(2,0,1,3))),((11,(9,10)),(5,(8,(6,7)))))))));      |
|     |            | MP        | (18,(((10,(8,9)),(12,(7,(5,(4,6))))),(17,(16,((11,(15,(13,14))),(0,(3,(1,2))))))))); |
| 296 | 29,352     | MP        | (18,((14,(17,(15,16))),((5,(0,(2,(1,3))),((10,(11,12)),(13,((4,6),(9,(7,8)))))))));  |
|     |            | ML        | (18,(6,(8,(7,(5,((10,(9,11)),((12,(16,(14,15))),(17,(4,(13,(3,1,0,2)))))))))))));    |
| 297 | 945        | MP        | (18,((17,(16,(14,15))),((5,(4,(0,(1,(2,3))))),(13,((12,(10,11)),(6,(7,(8,9))))))))); |
|     |            | ML        | (18,(17,((16,(14,15)),((4,(13,(0,(1,3,2))))),(12,((11,(9,10)),(5,(6,(7,8)))))))));   |
| 298 | 1,916      | MP        | (18,((17,(16,(14,15))),((13,(4,(0,(3,(1,2))))),(11,(9,10)),(12,(5,(6,(7,8)))))))));  |
|     |            | ML        | (18,((16,(14,15)),(17,(12,((4,(13,(0,(2,(1,3))))),(10,(9,11)),(8,(6,(5,7)))))))));   |
| 299 | 24,454     | MP        | (18,((5,(4,((13,(11,12)),(10,(9,(7,8))))),(17,((16,(14,15)),(6,(3,(1,(2,0)))))))));  |
|     |            | ML        | (18,((17,(16,(14,15))),((5,(4,(0,(1,(2,3))))),(6,(7,8)),(13,(12,(11,(9,10)))))))));  |
| 300 | 14,405     | MP        | (18,((12,(17,(16,(14,15))),((4,(13,(0,3,1,2))),((10,(9,11)),(5,(7,(6,8)))))))));     |
|     |            | ML        | (18,((17,(16,(14,15))),(13,((5,(4,(2,3),(1,0))),((11,(10,12)),(6,(7,(8,9)))))))));   |
| 301 | 7,980      | MP        | (18,((17,(16,(14,15))),((4,(13,(0,(2,(1,3))))),(9,(10,11)),(12,(5,(8,(6,7)))))))));  |
|     |            | ML        | (18,((17,(16,(14,15))),((5,(4,(1,(2,(3,0))))),(13,((11,(10,12)),(7,(9,(6,8))))))))); |
| 302 | 4,579      | MP        | (18,((17,(16,(14,15))),((13,(4,(0,(1,2,3))),(12,((9,(10,11)),(5,(6,(7,8)))))))));    |
|     |            | ML        | (18,((17,(16,(14,15))),((4,(5,(0,(3,(1,2))))),(10,(11,12)),(13,(9,(7,(6,8)))))))));  |
| 303 | 26,356     | MP        | (18,((13,(4,(0,(2,(1,3))))),(9,(10,11)),(5,(7,(6,8))),(12,(17,(16,(14,15))))))));    |
|     |            | ML        | (18,((13,(6,(9,(7,8))),((4,(0,(2,(1,3))),((11,(10,12)),(5,(17,(16,(14,15)))))))));   |
| 304 | 36,797     | MP        | (18,(17,((16,(14,15)),(12,((4,(13,(0,3,2,1))),((10,(9,11)),(5,(6,(7,8)))))))));      |
|     |            | ML        | (18,(((13,(12,(10,11))),(17,(16,(14,15))),((5,(9,(8,(6,7))),(4,(0,(3,(1,2)))))))));  |
| 305 | 9,437      | MP        | (18,((12,(17,(16,(14,15))),((4,(13,(3,1,(0,2))),((9,(10,11)),(5,(6,(7,8)))))))));    |
|     |            | ML        | (18,((17,(4,(0,(2,(1,3))))),(14,((12,13),(15,16))),((11,(9,10)),(7,(5,(6,8))))))))); |
| 306 | 19,956     | MP        | (18,((17,(16,(14,15))),((13,(4,(3,(0,1,2))),(12,((10,(9,11)),(8,(6,(5,7)))))))));    |
|     |            | ML        | (18,(((16,(14,15)),(17,(2,(1,(3,0))))),(12,(4,13)),((11,(9,10)),(8,(7,(5,6))))))))); |
| 306 | 19,956     | MP        | (18,((11,(9,10)),((13,(0,(3,(1,2))),((4,(7,(5,6))),((12,(8,14)),(17,(15,16))))))))); |
|     |            | ML        | (18,((4,(13,(2,1,0,3))),((11,(9,10)),((8,(7,(5,6))),(12,(17,(16,(14,15)))))))));     |
| 306 | 19,956     | MP        | (18,((17,(16,(14,15))),((9,(10,11)),(5,(8,(6,7))),((4,(12,13)),(0,(1,(2,3)))))))));  |
|     |            | ML        | (18,(17,((16,(14,15)),((9,(10,11)),(5,(8,(6,7))),(12,(4,(13,(0,(2,1,3)))))))));      |
