# Supplementary material for: Genome-level homology and phylogeny of Vibrionaceae (Gammaproteobacteria: Vibrionales) with three new complete genome sequences
Source: PubMed Central journal article supplement (PMC3663674; doi:10.1186/1471-2180-13-80), 2013-04-11
Supplement: 1471-2180-13-80-S2.pdf [file 1471-2180-13-80-S2.pdf]

Table S2: Vibrionaceae 19–taxon small chromosome dataset LCBs and trees.

| LCB | Aligned bp | Algorithm      | Tree topologies (Newick)                                                                                                                                                                                                                                          |
|-----|------------|----------------|-------------------------------------------------------------------------------------------------------------------------------------------------------------------------------------------------------------------------------------------------------------------|
| 1   | 6,886      | MP<br>ML       | (18,(10,((9,(11,(4,5))),((17,(15,16))),((0,(2,(1,3))),((6,(7,8)),(14,(12,13))))))));<br>(18,((16,(14,15)),(17,(12,((5,(8,(6,7))),((10,(9,11)),(4,(13,(0,(1,2,3))))))))));                                                                                         |
| 2   | 12,859     | MP<br>ML       | (18,(16,((17,(15,(13,14))),((12,(10,(9,11))),((8,(6,7)),(5,(4,(0,(2,(1,3))))))))));<br>(18,(12,((4,(13,(0,(1,2,3))),((9,(10,11)),((17,(16,(14,15))),(5,(7,(6,8))))))))));                                                                                         |
| 3   | 3,317      | MP<br>ML       | (18,(8,((11,(9,10)),(16,((0,(2,(1,3))),(17,((14,(13,15)),(7,(12,(6,(4,5))))))))));<br>(18,((11,(9,10)),(4,13),(0,1,2,3)),(12,((17,(16,(14,15))),(8,(5,(6,7))))));                                                                                                 |
| 4   | 3,675      | MP<br>ML       | (18,((8,(14,((7,(5,6)),(13,(11,(10,12)))))),(3,(2,(0,1))),(9,(4,(17,(15,16))))));<br>(18,((17,(16,(14,15))),((0,1,2,3),(4,13),(11,(9,10)),(12,(5,(8,(6,7))))))))));                                                                                               |
| 5   | 15,492     | MP<br>ML       | (18,((0,(3,(1,2))),(4,(5,((6,(9,(7,8))),((13,(11,12)),(10,(17,(16,(14,15))))))))));<br>(18,((17,(16,(14,15))),((4,(13,(0,(2,(1,3))))),((11,(9,10)),(12,(5,(8,(6,7))))))))));                                                                                      |
| 6   | 4,483      | MP<br>ML       | (18,(15,(8,((1,3),(0,2)),(6,(16,(13,14))),(9,(17,((4,(5,7)),(10,(11,12))))))))));<br>(18,(16,((14,15)),((17,12),(10,(9,11)),(13,((0,1,2,3),(4,(8,(6,(5,7))))))))));                                                                                               |
| 7   | 8,457      | MP<br>ML       | (18,(11,((14,(12,13)),(16,((0,(1,(2,3))),(17,(6,((4,(5,7)),(15,(10,(8,9))))))))));<br>(18,(17,((16,(14,15))),((4,13),(0,1,2,3)),(12,((10,(9,11)),(5,(7,(6,8))))))))));                                                                                            |
| 8   | 8,852      | MP<br>ML       | (18,((17,(15,16))),((6,(5,(4,(0,(2,(1,3))))),((14,(9,(7,8))),(12,(10,(11,13))))))))));<br>(18,((16,(14,15)),(17,((13,(4,(0,1,2,3))),(12,((11,(9,10)),(5,(7,(6,8))))))))));                                                                                        |
| 9   | 9,283      | MP<br>ML       | (18,(14,((17,(15,16)),((5,(4,(0,(3,(1,2))))),((13,(10,(11,12)),(6,(8,(7,9))))))))));<br>(18,((17,(16,(14,15))),((4,(13,(0,(2,(1,3))))),((12,((9,(10,11)),(5,(7,(6,8))))))))));                                                                                    |
| 10  | 6,334      | MP<br>ML       | (18,((11,(9,10)),((15,(16,17)),(8,((6,7),(5,(12,(13,(4,(14,(3,(1,(0,2))))))))))))));<br>(18,(17,((16,(14,15)),(4,(12,((5,8),(6,7)),(9,(10,11)),(13,(1,(0,2,3))))))))));                                                                                           |
| 11  | 4,517      | MP<br>MP<br>ML | (18,((15,(16,17)),((7,(6,8)),((4,(12,13),(11,(9,10))),((5,14),(0,(2,(1,3))))))))));<br>(18,((15,(16,17)),((8,(6,7)),((4,(12,13),(11,(9,10))),((5,14),(0,(2,(1,3))))))))));<br>(18,((17,(16,(14,15))),((12,((4,13),(0,(1,2,3))),((10,(9,11)),(5,(6,(7,8)))))))))); |
| 12  | 3,533      | MP<br>ML       | (18,((15,16),(17,(11,((14,(12,13)),(5,(6,(4,7))),((8,9),(10,(0,(2,(1,3))))))))));<br>(18,((16,(14,15)),(17,((0,1,2,3),(12,(4,13)),((10,(9,11)),(5,(8,(6,7))))))))));                                                                                              |
| 13  | 6,938      | MP<br>ML       | (18,((16,17)),((6,7),(4,(11,(12,((15,(13,14)),(8,(9,10)),(5,(0,(3,(1,2))))))))))))));<br>(18,((16,(14,15)),(17,(12,((4,(13,(0,(2,(1,3))))),((9,(10,11)),(5,(7,(6,8))))))))));                                                                                     |
| 14  | 9,316      | MP<br>ML       | (18,(16,((15,(13,14)),(17,(5,((1,3),(0,2)),((7,(6,8)),(4,(12,(9,(10,11))))))))));<br>(18,((16,(14,15)),(17,(12,((4,13),(0,1,2,3)),((10,(9,11)),(5,(8,(6,7))))))))));                                                                                              |
| 15  | 18,184     | MP<br>MP<br>ML | (18,((12,(11,13)),(6,(8,(9,10))),((17,(15,16)),(14,((4,7),(5,(0,(3,(1,2))))))))));<br>(18,((13,(11,12)),(6,(8,(9,10))),((17,(15,16)),(14,((4,7),(5,(0,(3,(1,2))))))))));<br>(18,(17,((16,(14,15))),((4,13),(0,(1,2,3))),((5,(6,(7,8))),(12,(11,(9,10))))))));     |
| 16  | 29,591     | MP<br>ML       | (18,(11,((9,(7,8)),((6,(4,5)),((2,3),(0,1)),((10,12),(13,(14,(17,(15,16))))))))));<br>(18,((5,7),(6,((8,(17,(16,(15,14))),((9,(10,11)),(12,((4,13),(0,2,(1,3))))))))));                                                                                           |
| 17  | 4,910      | MP<br>ML       | (18,((16,17),(14,(12,(13,((2,3),(0,1)),(4,(15,((11,(9,10)),(8,(5,(6,7))))))))))))));<br>(18,((10,(9,11)),(5,(7,(6,8))),((17,(16,(14,15))),(12,(4,(13,((1,3),(0,2))))))))));                                                                                       |
| 18  | 7,176      | MP<br>ML       | (18,(17,(4,((1,3),(0,2)),(8,((5,(6,7)),(13,((16,(14,15)),(9,(10,(11,12))))))))));<br>(18,((13,((4,17),(0,1,2,3))),((9,(10,11)),((5,6),(7,8))),(12,(16,(14,15))))));                                                                                               |
| 19  | 8,079      | MP             | (18,(17,(15,((14,(12,13)),(16,(11,((4,(0,(2,(1,3))),((7,(5,6)),(8,(9,10))))))))));                                                                                                                                                                                |

Table S2: Vibrionaceae 19–taxon small chromosome dataset LCBs and trees (continued).

| LCB | Aligned bp | Algorithm | Tree topologies (Newick)                                                          |
|-----|------------|-----------|-----------------------------------------------------------------------------------|
| 20  | 10,026     | ML        | (18,(17,((16,(14,15)),(12,((4,(13,(0,(1,2,3))))),(10,(9,11))),(8,(7,(5,6)))))))); |
|     |            | MP        | (18,(11,((8,9),(17,(12,(10,(13,(5,(7,(4,(6,((14,(15,16))),0,(2,(1,3))))))))))));  |
|     |            | MP        | (18,(11,((8,9),(17,(12,(10,(13,(5,(7,(4,(6,((16,(14,15))),0,(2,(1,3))))))))))));  |
| 21  | 5,655      | ML        | (18,((10,(9,11)),((5,(6,(7,8))),12,((4,(17,(16,(14,15))),13,(0,1,2,3))))));       |
|     |            | MP        | (18,(14,((0,(2,(1,3))),7,(12,((17,(15,16))),13,((4,(5,6)),8,(11,(9,10))))))));    |
|     |            | ML        | (18,(17,((16,(14,15)),((4,(13,(0,(1,2,3))))),(12,((9,(10,11)),5,(8,(6,7))))))));  |
| 22  | 7,884      | MP        | (18,(14,(5,((7,(6,8)),13,(9,(12,(10,11))))),(4,((17,(15,16))),0,(2,(1,3))))));    |
|     |            | ML        | (18,(6,7,(8,(5,(12,((17,(16,(14,15))),4,(13,((9,(10,11))),0,(1,2,3))))))));       |
| 23  | 12,137     | MP        | (18,((10,(13,((7,(5,6)),9,(11,12))))),(17,(16,(14,15))),4,(8,(0,(2,(1,3))))));    |
|     |            | ML        | (18,((17,(16,(14,15))),((12,(7,(6,(5,8))),13,((4,(10,(9,11))),0,1,2,3))))));      |
| 24  | 4,709      | MP        | (18,(14,((17,(15,16))),12,((13,(11,((1,3),(0,2))),10,(8,9))),4,(7,(5,6))))));     |
|     |            | ML        | (18,((17,(16,(14,15))),((9,(10,11))),5,(8,(6,7))),12,(4,(13,(0,1,2,3))))));       |
| 25  | 8,571      | MP        | (18,((16,17),((4,10),(14,15)),5,((6,(0,(2,(1,3))),7,(8,9))),11,(12,13))))));      |
|     |            | ML        | (18,(17,((16,(14,15)),12,((4,13),(0,(1,2,3))),9,(10,11)),5,(8,(6,7))))));         |
| 26  | 14,483     | MP        | (18,(17,((9,(8,(6,7))),4,(0,(2,(1,3))),13,(11,12)),5,(10,(16,(14,15))))));        |
|     |            | ML        | (18,((9,(10,11)),(5,6),(7,8)),12,((17,(16,(14,15))),4,(13,(0,(1,2,3))))));        |
| 27  | 3,394      | MP        | (18,((17,(16,(14,15))),13,(11,((8,(9,10))),5,(6,7)),12,(4,(0,(2,(1,3))))));       |
|     |            | MP        | (18,((17,(16,(14,15))),13,((8,(9,10)),11,((5,(6,7)),12,(4,(0,(2,(1,3))))));       |
|     |            | ML        | (18,(11,10,((9,17),((4,(13,(0,(1,2,3))),8,((5,(6,7)),12,(16,(14,15))))))));       |
| 28  | 12,941     | MP        | (18,(5,(4,(17,(12,(9,((7,8)),6,((13,(14,15))),16,(10,11))),3,(2,(0,1))))));       |
|     |            | ML        | (18,((13,(4,(0,(1,2,3))),17,((12,(16,(14,15))),8,(6,(7,(5,(9,(10,11))))))));      |
| 29  | 12,274     | MP        | (18,((16,(14,15)),((0,(2,(1,3))),5,(6,7)),13,(9,(11,(10,(12,(8,(4,17))))))));     |
|     |            | MP        | (18,((16,(14,15)),((0,(2,(1,3))),5,(6,7)),13,((9,11),(10,(12,(8,(4,17))))));      |
|     |            | ML        | (18,((16,(17,(14,15))),5,(8,(7,(6,((4,(9,(10,11))),12,(13,(0,(1,2,3))))))));      |
| 30  | 6,769      | MP        | (18,(14,((17,(15,16))),5,(4,(0,(2,(1,3))),9,(6,(7,8))),13,(10,(11,12))))));       |
|     |            | ML        | (18,(17,((16,(14,15))),((9,(10,11)),5,(8,(6,7))),12,(4,(13,(0,(1,2,3))))));       |
| 31  | 8,239      | MP        | (18,((4,5),((11,(10,12)),9,((8,(6,7)),13,((17,(15,16))),0,(14,(2,(1,3))))));      |
|     |            | ML        | (18,((13,(0,(1,2,3))),4,((12,(16,(14,15))),5,(6,(7,8))),17,(9,(10,11))))));       |
| 32  | 7,550      | MP        | (18,(17,((16,(14,15))),11,((10,(8,9)),13,(4,((12,(7,(5,6))),3,(1,(0,2))))));      |
|     |            | ML        | (18,(17,(12,(4,(13,(2,(0,1,3))))),(5,(8,(6,7))),16,(14,15)),11,(9,10))))));       |
| 33  | 10,552     | MP        | (18,(17,(14,((15,16)),10,(4,5)),3,(1,(0,2))),9,((8,(6,7)),13,(11,12))))));        |
|     |            | ML        | (18,((17,(16,(14,15))),13,((2,(0,1,3)),4,(12,((11,(9,10)),8,(7,(5,6))))));        |
| 34  | 11,554     | MP        | (18,((3,(1,(0,2))),13,(4,((17,(16,(14,15))),12,((10,(9,11)),8,(6,(5,7))))));      |
|     |            | ML        | (18,((10,(9,11)),12,(8,(5,(6,7))),17,(16,(14,15))),4,(13,(0,1,2,3))))));          |
| 35  | 11,718     | MP        | (18,(4,(5,((10,((2,3),(0,1))),16,(14,15)),6,(8,(7,9))),11,(13,(12,17))))));       |
|     |            | ML        | (18,((9,(10,11)),6,(7,(5,8))),17,((4,(12,(16,(14,15))),13,(1,3,(0,2))))));        |
| 36  | 16,953     | MP        | (18,((16,17),((14,15),13,((7,(6,8)),10,(11,12))),9,((4,5),((2,3),(0,1))))));      |
|     |            | ML        | (18,((16,(14,15))),((9,(10,11)),8,(6,(5,7))),17,((4,12),13,((1,3),(0,2))))));     |
| 37  | 86,301     | MP        | (18,((16,(14,15))),17,((11,(12,13)),10,(7,(8,9))),6,(5,(4,((2,3),(0,1))))));      |

Table S2: Vibrionaceae 19-taxon small chromosome dataset LCBs and trees (continued).

| LCB | Aligned bp | Algorithm | Tree topologies (Newick)                                                              |
|-----|------------|-----------|---------------------------------------------------------------------------------------|
|     |            | ML        | (18,(17,((16,(14,15)),(((10,(9,11)),(5,(8,(6,7))))),(12,(4,(13,((1,3),(0,2)))))))))); |
