# Supplementary material for: Genome-level homology and phylogeny of Vibrionaceae (Gammaproteobacteria: Vibrionales) with three new complete genome sequences
Source: PubMed Central journal article supplement (PMC3663674; doi:10.1186/1471-2180-13-80), 2013-04-11
Supplement: 1471-2180-13-80-S3.pdf [file 1471-2180-13-80-S3.pdf]

Table S3: Genes Found in RAST Subsystems for All Species Part 1:

(A = *P. angustum*, B = *P. damselae*, C = *A. fischeri* ES114, D = *V. gazogenes*, E = *A. logei*, F = *P. profundum*, G = *A. salmonicida*, H = *P. sp.* SKA34, I = *S. oneidensis*, J = *V. alginolyticus* 12, K = *V. anguillarum*).

| RAST Subsystem                                        | # in<br>Fig. 7 | A    | B    | C    | D    | E    | F    | G    | H    | I    | J    | K    |
|-------------------------------------------------------|----------------|------|------|------|------|------|------|------|------|------|------|------|
| Cofactors, Vitamins, Prosthetic Groups,<br>Pigments   | 1              | 244  | 301  | 287  | 354  | 193  | 336  | 277  | 190  | 307  | 252  | 277  |
| Cell Wall and Capsule                                 | 2              | 122  | 180  | 213  | 71   | 111  | 184  | 247  | 106  | 147  | 134  | 195  |
| Virulence, Disease and Defense                        | 3              | 99   | 89   | 88   | 94   | 100  | 113  | 85   | 82   | 86   | 87   | 66   |
| Potassium Metabolism                                  | 4              | 35   | 31   | 28   | 39   | 26   | 30   | 30   | 27   | 30   | 36   | 20   |
| Photosynthesis                                        |                | 0    | 0    | 0    | 0    | 0    | 0    | 0    | 0    | 0    | 0    | 0    |
| Miscellaneous                                         | 5              | 200  | 160  | 222  | 180  | 168  | 171  | 214  | 170  | 228  | 165  | 135  |
| Phages, Prophages, Transposable elements,<br>Plasmids | 6              | 3    | 10   | 23   | 11   | 36   | 11   | 24   | 3    | 26   | 7    | 5    |
| Membrane Transport                                    | 7              | 177  | 215  | 195  | 150  | 231  | 191  | 291  | 117  | 144  | 185  | 153  |
| Iron acquisition and metabolism                       | 8              | 75   | 38   | 70   | 11   | 94   | 49   | 75   | 84   | 47   | 69   | 25   |
| RNA Metabolism                                        | 9              | 209  | 209  | 286  | 189  | 114  | 234  | 230  | 143  | 268  | 187  | 198  |
| Nucleosides and Nucleotides                           | 10             | 90   | 116  | 110  | 115  | 70   | 162  | 105  | 100  | 100  | 107  | 108  |
| Protein Metabolism                                    | 11             | 233  | 265  | 253  | 171  | 206  | 198  | 247  | 191  | 262  | 139  | 212  |
| Cell Division and Cell Cycle                          | 12             | 43   | 38   | 44   | 40   | 48   | 32   | 48   | 34   | 36   | 23   | 32   |
| Motility and Chemotaxis                               | 13             | 149  | 93   | 115  | 37   | 120  | 60   | 109  | 148  | 123  | 163  | 138  |
| Regulation and Cell signaling                         | 14             | 98   | 90   | 108  | 114  | 108  | 110  | 107  | 82   | 66   | 107  | 92   |
| Secondary Metabolism                                  |                | 0    | 0    | 0    | 0    | 0    | 2    | 0    | 0    | 0    | 0    | 3    |
| DNA Metabolism                                        | 15             | 148  | 154  | 136  | 123  | 138  | 110  | 131  | 129  | 146  | 133  | 148  |
| Fatty Acids, Lipids and Isoprenoids                   | 16             | 133  | 116  | 114  | 160  | 90   | 158  | 111  | 125  | 117  | 110  | 112  |
| Nitrogen Metabolism                                   | 17             | 37   | 35   | 39   | 6    | 7    | 83   | 40   | 30   | 41   | 49   | 27   |
| Dormancy and Sporulation                              | 18             | 7    | 4    | 6    | 2    | 11   | 2    | 4    | 7    | 6    | 3    | 8    |
| Respiration                                           | 19             | 194  | 152  | 109  | 132  | 172  | 209  | 115  | 168  | 194  | 147  | 96   |
| Stress Response                                       | 20             | 170  | 152  | 135  | 190  | 146  | 172  | 119  | 152  | 124  | 179  | 119  |
| Metabolism of Aromatic Compounds                      | 21             | 10   | 3    | 3    | 11   | 6    | 12   | 6    | 13   | 12   | 10   | 11   |
| Amino Acids and Derivatives                           | 22             | 364  | 357  | 338  | 486  | 335  | 492  | 335  | 316  | 384  | 459  | 350  |
| Sulfur Metabolism                                     | 23             | 33   | 28   | 28   | 54   | 35   | 32   | 22   | 28   | 29   | 17   | 28   |
| Phosphorus Metabolism                                 | 24             | 62   | 41   | 35   | 64   | 38   | 50   | 40   | 48   | 46   | 46   | 41   |
| Carbohydrates                                         | 25             | 392  | 413  | 355  | 745  | 361  | 610  | 332  | 322  | 268  | 414  | 414  |
| RNAs                                                  | 26             | 130  | 223  | 156  | 121  | 125  | 161  | 141  | 148  | 129  | 70   | 108  |
| coding sequences                                      |                | 4403 | 4408 | 3766 | 5616 | 4807 | 5358 | 4259 | 4175 | 4486 | 4536 | 3687 |
