# Supplementary material for: Genome-level homology and phylogeny of Vibrionaceae (Gammaproteobacteria: Vibrionales) with three new complete genome sequences
Source: PubMed Central journal article supplement (PMC3663674; doi:10.1186/1471-2180-13-80), 2013-04-11
Supplement: 1471-2180-13-80-S4.pdf [file 1471-2180-13-80-S4.pdf]

Table S6: Vibrionaceae 19-taxon random subset datasets LCBs and trees.

| Chromosome | Aligned bp | Algorithm                                                                           | Tree topologies (Newick)                                                             |
|------------|------------|-------------------------------------------------------------------------------------|--------------------------------------------------------------------------------------|
| Large      | 10,000     | MP                                                                                  | (18,(17,((16,(14,15)),((13,(4,(0,(2,(1,3))))),(12,((10,(9,11)),(5,(8,(6,7)))))))));  |
|            |            | ML                                                                                  | (18,((17,(16,(14,15))),((12,((4,(13,(0,(2,(1,3))))),(10,(9,11)),(5,(8,(6,7))))))))); |
|            | 20,000     | MP                                                                                  | (18,((17,(16,(14,15))),((4,(13,(0,(2,(1,3))))),(12,((10,(9,11)),(8,(5,(6,7))))))))); |
|            |            | ML                                                                                  | (18,((17,(16,(14,15))),((12,((4,(13,(0,(2,(1,3))))),(9,(10,11)),(5,(8,(6,7))))))))); |
|            | 30,000     | MP                                                                                  | (18,((17,(16,(14,15))),((4,(13,(0,(2,(1,3))))),(12,((10,(9,11)),(5,(8,(6,7))))))))); |
|            |            | ML                                                                                  | (18,((17,(16,(14,15))),((12,((4,(13,(0,(2,(1,3))))),(9,(10,11)),(5,(6,(7,8))))))))); |
|            | 40,000     | MP                                                                                  | (18,((17,(16,(14,15))),((13,(4,(0,(2,(1,3))))),(12,((10,(9,11)),(5,(8,(6,7))))))))); |
|            |            | ML                                                                                  | (18,((17,(16,(14,15))),((4,(13,(0,(2,(1,3))))),(12,(9,(10,11)),(5,(8,(6,7)))))))));  |
|            | 50,000     | MP                                                                                  | (18,((17,(16,(14,15))),((4,(13,(0,(2,(1,3))))),(12,((10,(9,11)),(5,(8,(6,7))))))))); |
|            |            | ML                                                                                  | (18,((17,(16,(14,15))),((4,(13,(0,(2,(1,3))))),(12,((10,(9,11)),(5,(8,(6,7))))))))); |
|            | 100,000    | MP                                                                                  | (18,((17,(16,(14,15))),((13,(4,(0,(2,(1,3))))),(12,((10,(9,11)),(5,(8,(6,7))))))))); |
|            |            | ML                                                                                  | (18,(17,((16,(14,15)),(12,((4,(13,(0,(2,(1,3))))),(11,(9,10)),(5,(8,(6,7)))))))));   |
|            | 200,000    | MP                                                                                  | (18,(17,((16,(14,15)),((4,(13,(0,(2,(1,3))))),(12,((10,(9,11)),(5,(8,(6,7)))))))));  |
|            |            | ML                                                                                  | (18,((17,(16,(14,15))),((12,((4,(13,(0,(2,(1,3))))),(10,(9,11)),(5,(8,(6,7))))))))); |
|            | 300,000    | MP                                                                                  | (18,(17,((16,(14,15)),((4,(13,(0,(2,(1,3))))),(12,((10,(9,11)),(5,(8,(6,7)))))))));  |
|            |            | ML                                                                                  | (18,((17,(16,(14,15))),((12,((4,(13,(0,(2,(1,3))))),(10,(9,11)),(5,(8,(6,7))))))))); |
|            | 400,000    | MP                                                                                  | (18,(17,((16,(14,15)),((4,(13,(0,(2,(1,3))))),(12,((10,(9,11)),(5,(8,(6,7)))))))));  |
|            |            | ML                                                                                  | (18,((17,(16,(14,15))),((12,((4,(13,(0,(2,(1,3))))),(11,(9,10)),(5,(8,(6,7))))))))); |
|            | 500,000    | MP                                                                                  | (18,((17,(16,(14,15))),((4,(13,(0,(2,(1,3))))),(12,((10,(9,11)),(5,(8,(6,7))))))))); |
|            |            | ML                                                                                  | (18,((17,(16,(14,15))),((12,((4,(13,(0,(2,(1,3))))),(10,(9,11)),(5,(8,(6,7))))))))); |
| 1,000,000  | MP         | (18,(17,((16,(14,15)),((4,(13,(0,(2,(1,3))))),(12,((10,(9,11)),(5,(8,(6,7))))))))); |                                                                                      |
|            | ML         | (18,(17,((16,(14,15)),((4,(13,(0,(2,(1,3))))),(12,((10,(9,11)),(5,(8,(6,7))))))))); |                                                                                      |
| Small      | 10,000     | MP                                                                                  | (18,((16,(14,15)),(17,((4,(13,(0,(2,(1,3))))),(12,((9,(10,11)),(8,(5,(6,7)))))))));  |
|            |            | ML                                                                                  | (18,((17,(16,(14,15))),((12,((4,(13,(1,3,(2,0))))),(11,(10,9)),(5,(8,(6,7)))))))));  |
|            | 20,000     | MP                                                                                  | (18,((16,(14,15)),(17,((4,(13,(0,(2,(1,3))))),(12,((9,(10,11)),(8,(5,(6,7)))))))));  |
|            |            | ML                                                                                  | (18,((16,(14,15)),(17,((4,(13,(0,(2,(1,3))))),(12,((9,(10,11)),(8,(5,(6,7)))))))));  |
|            | 30,000     | MP                                                                                  | (18,((16,(14,15)),(17,((4,(13,(0,(2,(1,3))))),(12,((9,(10,11)),(8,(5,(6,7)))))))));  |
|            |            | ML                                                                                  | (18,((16,(14,15)),(17,((4,(13,(0,(2,(1,3))))),(12,((9,(10,11)),(8,(5,(6,7)))))))));  |
|            | 40,000     | MP                                                                                  | (18,((16,(14,15)),(17,((4,(13,(0,(2,(1,3))))),(12,((9,(10,11)),(8,(5,(6,7)))))))));  |
|            |            | ML                                                                                  | (18,((17,(16,(14,15))),((12,((4,(13,(0,(2,(1,3))))),(10,(11,9)),(5,(8,(6,7))))))))); |
|            | 50,000     | MP                                                                                  | (18,((16,(14,15)),(17,((4,(13,(0,(2,(1,3))))),(12,((9,(10,11)),(8,(5,(6,7)))))))));  |
|            |            | ML                                                                                  | (18,((17,(16,(14,15))),((4,(13,(0,(2,(1,3))))),(12,(9,(10,11)),(5,(8,(6,7)))))))));  |
|            | 100,000    | MP                                                                                  | (18,((16,(14,15)),(17,((4,(13,(0,(2,(1,3))))),(12,((9,(10,11)),(8,(5,(6,7)))))))));  |
|            |            | ML                                                                                  | (18,((17,(16,(14,15))),((12,((4,(13,(0,(2,(1,3))))),(9,(10,11)),(5,(8,(6,7))))))))); |
|            | 200,000    | MP                                                                                  | (18,((16,(14,15)),(17,((4,(13,(0,(2,(1,3))))),(12,((9,(10,11)),(8,(5,(6,7)))))))));  |

Table S6: Vibrionaceae 19–taxon random subset datasets LCBs and trees (continued).

| Chromosome | Aligned bp | Algorithm | Tree topologies (Newick)                                                             |
|------------|------------|-----------|--------------------------------------------------------------------------------------|
|            | 300,000    | ML        | (18,((17,(16,(14,15))),((4,(13,(0,(2,(1,3)))))),((9,(10,11)),(5,(8,(6,7))))))));     |
|            |            | MP        | (18,((16,(14,15)),(17,((4,(13,(0,(2,(1,3)))))),(12,((9,(10,11)),(8,(5,(6,7))))))));  |
|            |            | ML        | (18,((17,(16,(14,15))),((4,(13,(0,(2,(1,3)))))),((9,(10,11)),(5,(8,(6,7))))))));     |
| both       | 10,000     | MP        | (18,(17,((16,(14,15))),((4,(13,(0,(2,(1,3)))))),(12,((10,(9,11)),(8,(5,(6,7)))))))); |
|            |            | ML        | (18,(17,((16,(14,15))),((4,(13,(0,(2,(1,3)))))),(12,((10,(9,11)),(5,(8,(6,7)))))))); |
|            | 20,000     | MP        | (18,(17,((16,(14,15))),((4,(13,(0,(2,(1,3)))))),(12,((10,(9,11)),(5,(8,(6,7)))))))); |
|            |            | ML        | (18,((17,(16,(14,15))),((4,(13,(0,(2,(1,3)))))),((11,(9,10)),(5,(6,(7,8))))))));     |
|            | 30,000     | MP        | (18,(17,((16,(14,15))),((4,(13,(0,(2,(1,3)))))),(12,((10,(9,11)),(5,(8,(6,7)))))))); |
|            |            | ML        | (18,((17,(16,(14,15))),((4,(13,(0,(2,(1,3)))))),((9,(10,11)),(5,(8,(6,7))))))));     |
|            | 40,000     | MP        | (18,((17,(16,(14,15))),((4,(13,(0,(2,(1,3)))))),(12,((10,(9,11)),(5,(8,(6,7)))))))); |
|            |            | ML        | (18,((17,(16,(14,15))),((4,(13,(0,(2,(1,3)))))),((10,(9,11)),(5,(8,(6,7))))))));     |
|            | 50,000     | MP        | (18,(17,((16,(14,15))),((4,(13,(0,(2,(1,3)))))),(12,((10,(9,11)),(5,(8,(6,7)))))))); |
|            |            | ML        | (18,((17,(16,(14,15))),((4,(13,(0,(2,(1,3)))))),((9,(10,11)),(5,(8,(6,7))))))));     |
|            | 100,000    | MP        | (18,(17,((16,(14,15))),((4,(13,(0,(2,(1,3)))))),(12,((10,(9,11)),(8,(5,(6,7)))))))); |
|            |            | ML        | (18,((17,(16,(14,15))),((4,(13,(0,(2,(1,3)))))),((10,(9,11)),(5,(8,(6,7))))))));     |
|            | 200,000    | MP        | (18,(17,((16,(14,15))),((4,(13,(0,(2,(1,3)))))),(12,((10,(9,11)),(5,(8,(6,7)))))))); |
|            |            | ML        | (18,((17,(16,(14,15))),((4,(13,(0,(2,(1,3)))))),((9,(10,11)),(5,(8,(6,7))))))));     |
|            | 300,000    | MP        | (18,(17,((16,(14,15))),((4,(13,(0,(2,(1,3)))))),(12,((10,(9,11)),(5,(8,(6,7)))))))); |
|            |            | ML        | (18,((17,(16,(14,15))),((4,(13,(0,(2,(1,3)))))),((9,(10,11)),(5,(8,(6,7))))))));     |
|            | 400,000    | MP        | (18,(17,((16,(14,15))),((4,(13,(0,(2,(1,3)))))),(12,((10,(9,11)),(5,(8,(6,7)))))))); |
|            |            | ML        | (18,((17,(16,(14,15))),((4,(13,(0,(2,(1,3)))))),((9,(10,11)),(5,(8,(6,7))))))));     |
|            | 500,000    | MP        | (18,(17,((16,(14,15))),((4,(13,(0,(2,(1,3)))))),(12,((10,(9,11)),(5,(8,(6,7)))))))); |
|            |            | ML        | (18,((17,(16,(14,15))),((4,(13,(0,(2,(1,3)))))),((9,(10,11)),(5,(8,(6,7))))))));     |
|            | 1,000,000  | MP        | (18,(17,((16,(14,15))),((4,(13,(0,(2,(1,3)))))),(12,((10,(9,11)),(5,(8,(6,7)))))))); |
|            |            | ML        | (18,(17,((16,(14,15))),((4,(13,(0,(2,(1,3)))))),(12,((10,(9,11)),(5,(8,(6,7)))))))); |
