# Supplementary material for: Genome-level homology and phylogeny of Vibrionaceae (Gammaproteobacteria: Vibrionales) with three new complete genome sequences
Source: PubMed Central journal article supplement (PMC3663674; doi:10.1186/1471-2180-13-80), 2013-04-11
Supplement: 1471-2180-13-80-S5.pdf [file 1471-2180-13-80-S5.pdf]

Table S4: Genes Found in RAST Subsystems for All Species Part 2:

(L = *V. brasiliensis*, M = *V. cholerae* ElTor, N = *V. corallilyticus*, O = *S. costicola*, P = *V. furnissii*, Q = *V. campbellii*, R = *G. hollisae*, S = *V. ichthyenteri*, T = *V. metschnikovii*, U = *V. mimicus* M, V = *V. nigripulchritudo*).

| RAST Subsystem                                     | # in Fig. 7 | L    | M    | N    | O    | P    | Q    | R    | S    | T    | U    | V    |
|----------------------------------------------------|-------------|------|------|------|------|------|------|------|------|------|------|------|
| Cofactors, Vitamins, Prosthetic Groups, Pigments   | 1           | 307  | 297  | 325  | 373  | 314  | 325  | 288  | 299  | 256  | 289  | 372  |
| Cell Wall and Capsule                              | 2           | 159  | 201  | 198  | 251  | 175  | 181  | 177  | 183  | 145  | 221  | 189  |
| Virulence, Disease and Defense                     | 3           | 89   | 86   | 102  | 110  | 82   | 101  | 67   | 92   | 67   | 72   | 91   |
| Potassium Metabolism                               | 4           | 28   | 23   | 27   | 27   | 28   | 32   | 27   | 25   | 26   | 24   | 28   |
| Photosynthesis                                     |             | 0    | 0    | 0    | 0    | 0    | 0    | 0    | 0    | 0    | 0    | 0    |
| Miscellaneous                                      | 5           | 199  | 172  | 168  | 288  | 183  | 238  | 154  | 152  | 152  | 168  | 172  |
| Phages, Prophages, Transposable elements, Plasmids | 6           | 7    | 25   | 4    | 5    | 9    | 23   | 10   | 13   | 3    | 7    | 4    |
| Membrane Transport                                 | 7           | 180  | 169  | 194  | 133  | 196  | 187  | 132  | 122  | 127  | 187  | 279  |
| Iron acquisition and metabolism                    | 8           | 56   | 47   | 73   | 23   | 56   | 60   | 50   | 37   | 36   | 60   | 43   |
| RNA Metabolism                                     | 9           | 206  | 277  | 218  | 338  | 212  | 235  | 199  | 207  | 193  | 207  | 216  |
| Nucleosides and Nucleotides                        | 10          | 108  | 101  | 106  | 165  | 116  | 117  | 101  | 109  | 93   | 104  | 117  |
| Protein Metabolism                                 | 11          | 226  | 227  | 242  | 337  | 229  | 260  | 240  | 187  | 206  | 229  | 244  |
| Cell Division and Cell Cycle                       | 12          | 33   | 41   | 36   | 61   | 34   | 34   | 36   | 38   | 34   | 32   | 31   |
| Motility and Chemotaxis                            | 13          | 181  | 141  | 194  | 204  | 222  | 172  | 158  | 113  | 117  | 182  | 151  |
| Regulation and Cell signaling                      | 14          | 109  | 107  | 124  | 158  | 105  | 121  | 70   | 114  | 88   | 104  | 129  |
| Secondary Metabolism                               |             | 0    | 3    | 0    | 0    | 16   | 0    | 0    | 0    | 3    | 0    | 3    |
| DNA Metabolism                                     | 15          | 142  | 138  | 142  | 255  | 145  | 155  | 135  | 148  | 150  | 130  | 149  |
| Fatty Acids, Lipids and Isoprenoids                | 16          | 129  | 102  | 121  | 130  | 125  | 107  | 106  | 106  | 90   | 99   | 174  |
| Nitrogen Metabolism                                | 17          | 53   | 22   | 54   | 77   | 38   | 38   | 16   | 28   | 13   | 33   | 43   |
| Dormancy and Sporulation                           | 18          | 4    | 2    | 6    | 6    | 3    | 4    | 2    | 3    | 3    | 2    | 4    |
| Respiration                                        | 19          | 109  | 118  | 126  | 173  | 170  | 152  | 128  | 107  | 95   | 108  | 138  |
| Stress Response                                    | 20          | 164  | 137  | 161  | 246  | 161  | 175  | 138  | 145  | 131  | 147  | 178  |
| Metabolism of Aromatic Compounds                   | 21          | 11   | 17   | 13   | 6    | 11   | 11   | 16   | 11   | 9    | 26   | 48   |
| Amino Acids and Derivatives                        | 22          | 477  | 339  | 467  | 537  | 471  | 425  | 340  | 344  | 349  | 366  | 420  |
| Sulfur Metabolism                                  | 23          | 25   | 30   | 31   | 25   | 29   | 27   | 24   | 28   | 32   | 32   | 37   |
| Phosphorus Metabolism                              | 24          | 54   | 44   | 61   | 77   | 57   | 48   | 62   | 47   | 40   | 46   | 63   |
| Carbohydrates                                      | 25          | 414  | 416  | 475  | 561  | 462  | 441  | 389  | 433  | 388  | 473  | 682  |
| RNAs                                               | 26          | 61   | 123  | 121  | 196  | 132  | 153  | 125  | 66   | 112  | 119  | 86   |
| coding sequences                                   |             | 4275 | 3632 | 5127 | 5575 | 4488 | 5325 | 3600 | 4432 | 3404 | 3897 | 5700 |
