# Supplementary material for: Genome-level homology and phylogeny of Vibrionaceae (Gammaproteobacteria: Vibrionales) with three new complete genome sequences
Source: PubMed Central journal article supplement (PMC3663674; doi:10.1186/1471-2180-13-80), 2013-04-11
Supplement: 1471-2180-13-80-S6.pdf [file 1471-2180-13-80-S6.pdf]

Table S5: Genes Found in RAST Subsystems for All Species Part 3:

W = *V. orientalis*, X = *V. parahaemolyticus*, Y = *V. scopthalmi*, Z = *V. mediterranei*, AA = *V. sinaloensis*, BB = *V. splendidus*, CC = *V. sp. EJY3*, DD = *V. sp. Ex25*, EE = *V. sp. N418*, FF = *V. sp. RC341*, GG = *V. sp. RC586*, HH = *V. tubiashii*, II = *V. vulnificus* CMC)).

| RAST Subsystem                                     | # in Fig. 7 | W    | X    | Y    | Z    | AA   | BB   | CC   | DD   | EE   | FF   | GG   | HH   | II   |
|----------------------------------------------------|-------------|------|------|------|------|------|------|------|------|------|------|------|------|------|
| Cofactors, Vitamins, Prosthetic Groups, Pigments   | 1           | 302  | 243  | 296  | 270  | 320  | 260  | 341  | 248  | 312  | 277  | 289  | 324  | 311  |
| Cell Wall and Capsule                              | 2           | 169  | 175  | 183  | 206  | 214  | 202  | 178  | 157  | 172  | 214  | 197  | 189  | 192  |
| Virulence, Disease and Defense                     | 3           | 89   | 81   | 88   | 111  | 87   | 89   | 82   | 81   | 88   | 62   | 67   | 111  | 85   |
| Potassium Metabolism                               | 4           | 28   | 25   | 26   | 32   | 29   | 19   | 33   | 29   | 26   | 25   | 26   | 24   | 24   |
| Photosynthesis                                     |             | 0    | 0    | 0    | 0    | 0    | 0    | 0    | 0    | 0    | 0    | 0    | 0    | 0    |
| Miscellaneous                                      | 5           | 180  | 133  | 169  | 186  | 202  | 191  | 261  | 160  | 161  | 122  | 156  | 189  | 218  |
| Phages, Prophages, Transposable elements, Plasmids | 6           | 19   | 8    | 23   | 10   | 4    | 19   | 6    | 11   | 4    | 4    | 5    | 10   | 9    |
| Membrane Transport                                 | 7           | 189  | 189  | 178  | 211  | 199  | 193  | 194  | 181  | 148  | 146  | 155  | 262  | 209  |
| Iron acquisition and metabolism                    | 8           | 55   | 44   | 39   | 69   | 56   | 65   | 50   | 52   | 39   | 49   | 31   | 53   | 53   |
| RNA Metabolism                                     | 9           | 206  | 196  | 203  | 212  | 211  | 225  | 215  | 192  | 203  | 195  | 198  | 216  | 296  |
| Nucleosides and Nucleotides                        | 10          | 108  | 100  | 104  | 128  | 117  | 101  | 115  | 85   | 109  | 99   | 95   | 123  | 110  |
| Protein Metabolism                                 | 11          | 228  | 137  | 215  | 166  | 217  | 137  | 227  | 162  | 215  | 132  | 228  | 240  | 263  |
| Cell Division and Cell Cycle                       | 12          | 33   | 32   | 37   | 30   | 32   | 32   | 42   | 41   | 33   | 32   | 32   | 41   | 42   |
| Motility and Chemotaxis                            | 13          | 125  | 137  | 112  | 196  | 147  | 112  | 107  | 172  | 113  | 139  | 129  | 137  | 142  |
| Regulation and Cell signaling                      | 14          | 113  | 109  | 111  | 96   | 121  | 108  | 123  | 113  | 105  | 91   | 96   | 96   | 123  |
| Secondary Metabolism                               |             | 0    | 0    | 0    | 0    | 0    | 0    | 19   | 0    | 0    | 0    | 3    | 0    | 0    |
| DNA Metabolism                                     | 15          | 129  | 139  | 141  | 109  | 136  | 114  | 138  | 129  | 123  | 153  | 143  | 156  | 141  |
| Fatty Acids, Lipids and Isoprenoids                | 16          | 144  | 100  | 108  | 135  | 132  | 115  | 124  | 90   | 111  | 64   | 100  | 146  | 128  |
| Nitrogen Metabolism                                | 17          | 63   | 43   | 40   | 64   | 54   | 56   | 62   | 50   | 37   | 33   | 33   | 64   | 52   |
| Dormancy and Sporulation                           | 18          | 3    | 1    | 4    | 3    | 4    | 2    | 5    | 3    | 3    | 3    | 3    | 5    | 4    |
| Respiration                                        | 19          | 118  | 114  | 124  | 145  | 122  | 149  | 147  | 141  | 113  | 106  | 109  | 114  | 113  |
| Stress Response                                    | 20          | 160  | 148  | 147  | 172  | 168  | 147  | 195  | 169  | 147  | 135  | 140  | 168  | 168  |
| Metabolism of Aromatic Compounds                   | 21          | 12   | 11   | 10   | 36   | 11   | 20   | 37   | 9    | 13   | 12   | 9    | 13   | 9    |
| Amino Acids and Derivatives                        | 22          | 449  | 398  | 348  | 515  | 454  | 339  | 520  | 425  | 346  | 331  | 346  | 452  | 398  |
| Sulfur Metabolism                                  | 23          | 29   | 12   | 26   | 46   | 32   | 43   | 43   | 27   | 27   | 27   | 29   | 36   | 44   |
| Phosphorus Metabolism                              | 24          | 53   | 46   | 44   | 87   | 55   | 54   | 48   | 46   | 46   | 47   | 45   | 56   | 50   |
| Carbohydrates                                      | 25          | 424  | 424  | 422  | 648  | 478  | 404  | 620  | 385  | 425  | 430  | 390  | 507  | 492  |
| RNAs                                               | 26          | 127  | 104  | 69   | 77   | 57   | 106  | 148  | 105  | 72   | 91   | 115  | 79   | 139  |
| coding sequences                                   |             | 4204 | 4047 | 4534 | 5222 | 4529 | 4714 | 4830 | 4287 | 3985 | 3620 | 3684 | 5096 | 4637 |
